1  
2  
3  
4  
5  
6  
7  
8  
9  
10  
11  
12  
13  
14  
15  
16  
17

**Phylogenomics of a new fungal phylum reveals multiple waves of reductive evolution across Holomycota**

Luis Javier Galindo<sup>1</sup>, Purificación López-García<sup>1</sup>, Guifré Torruella<sup>1</sup>, Sergey Karpov<sup>2</sup> and David Moreira<sup>1</sup>

<sup>1</sup>Ecologie Systématique Evolution, CNRS, Université Paris-Saclay, AgroParisTech, Orsay, France.

<sup>2</sup>Department of Invertebrate Zoology, Faculty of Biology, St Petersburg State University, Russia

\* Corresponding authors

E-mails: [david.moreira@u-psud.fr](mailto:david.moreira@u-psud.fr); [luisjagg92@gmail.com](mailto:luisjagg92@gmail.com)

18 **Abstract**

19 Compared to well-known multicellular fungi and unicellular yeast, unicellular fungi with  
20 zoosporic, free-living flagellated stages remain poorly known and their phylogenetic position is  
21 often unresolved. Recently, 18S+28S rRNA gene molecular phylogenetic analyses of two atypical  
22 parasitic fungi with amoeboid zoospores and record-long simplified kinetosomes, *Amoeboradix*  
23 *gromovi* and *Sanchytrium tribonematis*, showed that they formed a monophyletic group without  
24 affinity with any known fungal clade. To assess their phylogenetic position and unique trait  
25 evolution, we sequenced single-cell genomes for both species. Phylogenomic analyses using 264  
26 protein markers and a comprehensive taxon sampling retrieved and almost fully-resolved fungal  
27 tree with these species forming a well-supported, fast-evolving clade sister to Blastocladiomycota.  
28 Chytridiomycota branched as sister to all other fungi, and the zoosporic fungus *Olpidium*  
29 *bornovanus* as sister to non-flagellated fungi. Comparative genomic analyses across Holomycota  
30 revealed an atypically reduced metabolic repertoire for sanchytrids given their placement in the  
31 tree. We infer four independent flagellum losses from the distribution of over 60 flagellum-specific  
32 proteins across Holomycota. The highly reduced sanchytrid flagellar machinery, notably their long  
33 kinetosome, might have been retained to support a putative light-sensing lipid organelle. Together  
34 with their phylogenetic position, these unique traits justify the erection of the novel phylum  
35 Sanchytriomycota. Our results also show that most of the hyphal morphogenesis gene repertoire  
36 of multicellular Fungi had already evolved in early holomycotan lineages.

37

38 Key words: Fungi, Holomycota, phylogenomics, Sanchytriomycota, flagella, hyphae

39

40 Multicellularity independently evolved in Fungi and Metazoa from unicellular ancestors along  
41 their respective eukaryotic branches, Holomycota and Holozoa, within Opisthokonta<sup>1</sup>. The  
42 ancestor of this major eukaryotic supergroup originated ~1-1,5 Ga ago<sup>2-4</sup> and likely possessed one  
43 posterior flagellum for propulsion in aquatic environments<sup>1</sup>. This character has been retained in  
44 many modern fungal lineages at least during some life cycle stages<sup>5,6</sup>. Along the holomycotan  
45 branch, the free-living, non-flagellated nucleariid amoebae were the first to diverge, followed by  
46 the flagellated, phagotrophic, endoparasitic Rozellida (Cryptomycota)<sup>7-9</sup> and Aphelida<sup>10</sup>, and the  
47 highly reduced, non-flagellated Microsporidia<sup>11,12</sup>. Aphelids branch as sister lineage to *bona fide*,  
48 osmotrophic, Fungi<sup>13</sup>. Within fungi, except for the secondary flagellar loss in the chytrid  
49 *Hyaloraphydium curvatum*<sup>14</sup>, all known early divergent taxa are zoosporic, having at least one  
50 flagellated stage.

51 Zoosporic fungi are widespread in all ecosystems, from soils to marine and freshwater  
52 systems, from tropical to Arctic regions<sup>15,16</sup>. They are highly diverse saprotrophs and/or parasites,  
53 participating in nutrient recycling through the “mycoloop”<sup>17-20</sup>. Initially considered monophyletic,  
54 zoosporic fungi were recently classified into Blastocladiomycota and Chytridiomycota<sup>21</sup>, in  
55 agreement with multigene molecular phylogenies<sup>13,21,22</sup>. These two lineages appear sister to the  
56 three main groups of non-flagellated fungi, Zoopagomycota, Mucoromycota and Dikarya, for  
57 which a single ancestral loss of the flagellum has been proposed<sup>23</sup>. Characterizing the yet poorly-  
58 known zoosporic fungi is important to understand the evolutionary changes (e.g. flagellum loss,  
59 hyphae development) that mediated land colonization and the adaptation of fungi to plant-  
60 dominated terrestrial ecosystems<sup>24,25</sup>. This requires a well-resolved phylogeny of fungi including  
61 all main zoosporic lineages. Unfortunately, previous phylogenomic analyses did not resolve which  
62 zoosporic group, either Blastocladiomycota or Chytridiomycota, is sister to non-flagellated  
63 fungi<sup>21,26,27</sup>. This lack of resolution may derive from the old age of these splits (~0,5-1 Ga)<sup>3,28,29</sup>  
64 and the existence of several radiations of fungal groups, notably during their co-colonization of  
65 land with plants<sup>25,30</sup>, which would leave limited phylogenetic signal to resolve these deep nodes<sup>22</sup>.

66 Because of this phylogenetic uncertainty, the number and timing of flagellum losses in  
67 fungi remain under debate, with estimates ranging between four and six for the whole  
68 Holomycota<sup>31</sup>. Improving taxon sampling with new, divergent zoosporic fungi can help resolving  
69 these deep nodes. One of such organisms is *Olpidium*, a morphologically reduced parasite of plant  
70 roots, nematodes and rotifers<sup>32,33</sup>. Although several few-genes phylogenies suggested a

71 relationship with Zoopagomycota<sup>26,31,34</sup>, its phylogenetic position remains unclear. Another  
72 interesting lineage of uncertain position is the sanchytrids, a group of chytrid-like parasites of algae  
73 represented by the genera *Amoeboradix* and *Sanchytrium*, which exhibit a highly reduced  
74 flagellum with an extremely long kinetosome<sup>35,36</sup>. Determining the phylogenetic position of these  
75 two zoosporic lineages remains decisive to infer the history of flagellum losses and the transition  
76 to hyphal-based multicellularity. With these objectives, we generated the first genome sequences  
77 for the sanchytrids *Amoeboradix gromovi* and *Sanchytrium tribonematis* and analysed them  
78 together with available genomic and transcriptomic data for *Olpidium*, Chytridiomycota and  
79 Blastocladiomycota. We obtained an almost fully-resolved phylogeny showing sanchytrids as a  
80 new fast-evolving lineage sister to Blastocladiomycota, and *Olpidium* as an independent lineage  
81 sister to the non-flagellated fungi. Contrasting with previous weakly-supported analyses<sup>13,22,37-39</sup>,  
82 we robustly placed the root of the fungal tree between chytrids and all other fungi. Our new  
83 phylogenomic framework of Fungi supports a conservative model of four flagellum losses in  
84 Holomycota and highlights the importance of early-diverging unicellular Holomycota in the  
85 evolution of hyphal-based multicellularity.

86

## 87 **Results and discussion**

88

### 89 **The new zoosporic fungal phylum Sanchytriomycota**

90 We isolated individual sporangia of *Amoeboradix gromovi* and *Sanchytrium tribonematis* by  
91 micromanipulation and sequenced their genomes after whole genome amplification. After  
92 thorough data curation (see Methods), we assembled two high-coverage genome sequences  
93 (123.9X and 45.9X, respectively) of 10.5 and 11.2 Mbp, encoding 7,220 and 9,638 proteins,  
94 respectively (Table 1). Comparison with a fungal dataset of 290 near-universal single-copy  
95 orthologs<sup>40</sup> indicated very high completeness for the two genomes (92.41% for *A. gromovi*;  
96 91.72% for *S. tribonematis*). The two sanchytrid genomes yielded similar sequence statistics  
97 (Table 1) but showed important differences with genomes from other well-known zoosporic fungi.  
98 They are five times smaller than those of Blastocladiomycota (40-50 Mb) and average chytrids  
99 (~20 to 101 Mb), an observation extensive to the number of protein coding genes. Their genome  
100 GC content (~35%) was much lower than that of Blastocladiomycota and most chytrids (40-57%,  
101 though some chytrids, like *Anaeromyces robustus*, can have values down to 16.3%<sup>41,42</sup>). Low GC

102 content correlates with parasitic lifestyle in many eukaryotes<sup>43</sup>. In Holomycota, low GC genomes  
103 are observed in microsporidian parasites and Neocallimastigomycota, both anaerobic and  
104 exhibiting reduced mitochondrion-derived organelles<sup>42,44</sup>, and in the aerobic parasite *Rozella*  
105 *allomycis*<sup>9</sup>. Although sanchytrids are aerobic parasites with similar life cycles to those of  
106 Blastocladiomycota and chytrids<sup>35,36,45</sup>, their smaller genome size and GC content suggest that they  
107 are more derived parasites. This pattern is accompanied by a global acceleration of evolutionary  
108 rate (see below), a trend also observed, albeit at lower extent, in *R. allomycis*<sup>9,46-48</sup>.

109 The mitochondrial genomes of *S. tribonematis* and *A. gromovi* showed similar trends. Gene  
110 order was highly variable (Supplementary Fig. 1), as commonly observed in Fungi<sup>49</sup>, and their size  
111 (24,749 and 27,055 bp, respectively) and GC content (25.86% and 30.69%, respectively) were  
112 substantially smaller than those of most other Fungi. However, despite these signs of reductive  
113 evolution, most of the typical core mitochondrial genes were present, indicating that they have  
114 functional mitochondria endowed with complete electron transport chains.

115 To resolve the previously reported unstable phylogenetic position of sanchytrids based on  
116 rRNA genes<sup>35</sup>, we carried out phylogenomic analyses on a manually curated dataset of 264  
117 conserved proteins (91,768 amino acid positions)<sup>13,50,51</sup> using Bayesian inference (BI) and  
118 maximum likelihood (ML) with the CAT<sup>52</sup> and PMSF<sup>53</sup> models of sequence evolution,  
119 respectively. Both mixture models are robust against homoplasy and long-branch attraction (LBA)  
120 artefacts<sup>22,52</sup>. We selected 69 species (dataset GBE69), including a wide representation of  
121 holomycota plus two holozoans, two amoebae and one apusomonad as outgroup. In addition to the  
122 new sanchytrid data, we incorporated several key zoosporic fungi: the two Blastocladiomycota  
123 *Paraphysoderma sedebokense*<sup>54-56</sup> and *Coelomomyces lativittatus*<sup>57</sup>, the enigmatic flagellated  
124 fungus *Olpidium bornovanus*<sup>58</sup>, and the non-flagellated chytrid *Hyaloraphidium curvatum*,  
125 thought to have completely lost its flagellum<sup>14</sup>. BI and ML phylogenomic analyses yielded the  
126 same tree topology for major fungal groups with only minor changes in the position of terminal  
127 branches (Fig. 1a). We recovered maximum statistical support for both the monophyly of  
128 sanchytrids (*A. gromovi* + *S. tribonematis*) and their sister position to Blastocladiomycota. Thus,  
129 sanchytrids form a new deep-branching zoosporic fungal clade. Given their divergence and marked  
130 genomic differences with their closest relatives (Blastocladiomycota), we propose to create the  
131 new phylum Sanchytriomycota to accommodate these fungal species (see description below).

132

### 133 **The new phylogeny of Fungi**

134 In addition to the strongly supported Sanchytriomycota phyl. nov. and Blastocladiomycota  
135 relationship, and contrasting with its previous unstable position in few-genes phylogenies<sup>26,34</sup>, we  
136 retrieved *O. bornovanus* as an independent lineage branching as sister to the major non-flagellated  
137 fungal clade. Chytrids appeared as sister group of all other fungi with full Bayesian posterior  
138 probability (PP=1) but moderate ML bootstrap support (BS=79%). Despite the use of a large  
139 dataset, some branches remained unresolved, in particular the position of Glomeromycota sister  
140 either to Mucoromycota or Dikarya (Fig. 1a).

141 As observed in rRNA gene-based phylogenies<sup>35</sup>, sanchytrids exhibited a very long branch  
142 (Fig. 1a), suggesting a fast evolutionary rate. Long branches associated with fast evolving  
143 genomes, well-known in Microsporidia<sup>46</sup> and other Holomycota, can induce LBA artefacts in  
144 phylogenetic analyses<sup>59-61</sup>. To ascertain if LBA affected the position of the fast-evolving  
145 sanchytrids and other fungi in our tree, we carried out several tests. First, we introduced in our  
146 dataset additional long-branched taxa, metchnikovellids and core Microsporidia, for a total of 84  
147 species and 83,321 conserved amino acid positions (dataset GBE84). Despite the inclusion of these  
148 LBA-prone fast-evolving taxa, we recovered the same topology as with the previous taxon  
149 sampling with just minor position changes for lineages within large clades (Supplementary Fig.  
150 2). Again, the sister relationship of sanchytrids and Blastocladiomycota and the monophyly of *O.*  
151 *bornovanus* and non-zoosporic fungi were fully supported. Chytrids were sister to all other fungi  
152 with full Bayesian PP and slightly higher ML BS (82%).

153 Second, we tested the influence of fast-evolving sites by applying a slow-fast approach<sup>62</sup>  
154 and progressively removing the fastest-evolving sites (in 5% steps) of both the 69- and 84-species  
155 alignments. The monophyly of sanchytrids and Blastocladiomycota obtained maximum support  
156 (>99% bootstrap) in all steps until only 25/20% (GBE69/GBE84) of the sites remained, when the  
157 phylogenetic signal was too low to resolve any deep-level relationship (Fig. 1b). The monophyly  
158 of sanchytrids and Blastocladiomycota was as strongly supported as that of Dikarya. A root of the  
159 fungal tree between sanchytrids + Blastocladiomycota and the rest of fungi always received poor  
160 support (<50% bootstrap). On the contrary, the root between chytrids and the rest of fungi was  
161 strongly supported (>90% bootstrap) by all datasets with 10% to 50% (GBE69) and 10% to 45%  
162 (GBE84) of the fast-evolving sites removed. The position of *Olpidium* as sister of the non-  
163 flagellated fungi also received high support (>95% bootstrap) until 25/60% (GBE69/GBE84) of

164 the fast-evolving sites were removed. Its previously proposed relationship with  
165 Zoopagomycota<sup>21,26</sup> was always poorly supported.

166 Third, we applied sequence recoding<sup>63</sup> to alleviate possible compositional biases in our  
167 data and, again, recovered the same tree topology for both BI and ML analyses except for minor  
168 changes in apical branches (Supplementary Fig. 3a-d). The general congruence between the  
169 recoded and non-recoded analyses indicates that our results were not disturbed by compositional  
170 biases.

171 Finally, we further tested the robustness of the position of chytrids and *Olpidium* using  
172 alternative topology (AU) tests. They did not reject alternative positions for the divergence of  
173 Chytridiomycota and Blastocladiomycota + Sanchytriomycota ( $p$ -values  $>0.05$ ; Supplementary  
174 Table 2), which likely reflected the weak phylogenetic signal concerning these deep branches<sup>22</sup>.  
175 However, we observed that, for the two datasets of 69 and 84 species, the  $p$ -values of trees showing  
176 chytrids as sister group of all other fungi were higher than those of trees with Blastocladiomycota  
177 + Sanchytriomycota as the first fungal branch to diverge (Supplementary Table 2). In the case of  
178 *Olpidium*, all tests significantly rejected its relationship with Zoopagomycota, in particular a close  
179 association with Basidiobolaceae<sup>26,31,34</sup> ( $p$ -value  $<0.001$ ), and supported its position as a new  
180 lineage sister to the large non-flagellated fungal clade ( $p$ -values 0.539 and 0.554 for GBE69 and  
181 GBE84, respectively). Based on the zoospore ultrastructure, *Olpidium* was also suggested to be  
182 related with *Caulochytrium protostelioides*<sup>21,64</sup>. However, *C. protostelioides* branched in our  
183 multi-gene phylogenies within Chytridiomycota with maximum support, confirming that  
184 ultrastructural similarity most likely reflects convergent evolution. All our results concur to  
185 confirm that *Olpidium* constitutes a new phylum-level fungal lineage (Olpidiomycota) sister to the  
186 non-flagellated fungi, in agreement with recent unpublished work by Chang et al.<sup>65</sup>.

187 The relative position of Chytridiomycota or Blastocladiomycota as first branch to diverge  
188 within Fungi has remained a major unresolved question<sup>66</sup>. If the earliest fungal split occurred ~1  
189 billion years ago<sup>29</sup>, the phylogenetic signal to infer it may have been largely eroded over time.  
190 Likewise, if radiation characterized early fungal evolution<sup>22</sup>, the accumulation of enough sequence  
191 substitutions during diversification would have been limited. This would explain the difficulty to  
192 resolve the deepest branches of the fungal tree, the fact that Chytridiomycota and  
193 Blastocladiomycota have alternatively been recovered as sisters of all other fungi<sup>21,26,27,39,65</sup> and  
194 the low support and discrepancies observed for the split between Glomeromycota and

195 Mucoromycota (with additional constraints related to their symbiotic adaptation to land  
196 plants<sup>24,67,68</sup>). The solid position of the root of the fungal tree on the chytrid branch revealed by our  
197 phylogenomic analyses with a richer dataset is additionally consistent with the distribution of so-  
198 considered derived characters in Blastocladiomycota, including sporic meiosis, relatively small  
199 numbers of carbohydrate metabolism genes and, in some species, hyphal-like apical growing  
200 structures (*Allomyces*) and narrow sporangia exit tubes (e.g. *Catenaria* spp.)<sup>5,69–71</sup>.

201

## 202 **Macroevolutionary trends in primary metabolism**

203 To assess if sanchytrid metabolic capabilities are as reduced as suggested by their small genome  
204 sizes, we inferred their metabolic potential in comparison with other major fungal clades as well  
205 as other opisthokonts and amoebzoa as outgroup (43 species). Only half of the predicted  
206 sanchytrid proteins could be functionally annotated using EggNOG<sup>72</sup> (3,838 for *A. gromovi*; 4,772  
207 for *S. tribonematis*), probably due to the fact that, being fast-evolving parasites<sup>35,36,45</sup>, many genes  
208 have evolved beyond recognition by annotation programs<sup>73,74</sup>. However, low annotation  
209 proportions are common in holomycotans, including fast-evolving parasites (e.g. only 20% and  
210 52% of the genes of the Microsporidia *Nosema parisii* and *Encephalitozoon cuniculi* could be  
211 assigned to Pfam domains and GO terms<sup>73,75</sup>) but also the less fast-evolving metchnikovellids  
212 (*Amphiamblys* sp., 45.6%), rozellids (*R. allomycis*, 64.9%; *P. saccamoebae*, 66.7%) and  
213 Blastocladiomycota (*P. sedebokerense*, 66.8%; *Catenaria anguillulae*, 47.5%; *Blastocladiella*  
214 *britannica*, 44.1%). We then compared the annotated metabolic repertoires of holomycotan phyla  
215 by focusing on 1,158 orthologous groups distributed in eight primary metabolism categories.  
216 Unexpectedly, cluster analyses based on the presence/absence of these genes did not group  
217 sanchytrids with canonical fungi and their closest aphelid relatives ( i.e. *Paraphelidium*), but with  
218 non-fungal parasites (*R. allomycis* *Mitosporidium daphniae* and *P. saccamoebae*) which show  
219 evidence of reductive genome evolution<sup>9,11,76</sup> (Fig. 2a). An even further metabolic reduction was  
220 observed in Neocallimastigomycota, gut-inhabiting symbiotic anaerobic chytrids<sup>33,77,78</sup>. A  
221 principal coordinate analysis of the same gene matrix confirmed this result (Fig. 2b).

222 At a more detailed level, the main differences in the metabolic complement of sanchytrids  
223 and that of canonical fungi (+*Paraphelidium*) concerned the carbohydrate and lipid transport and  
224 metabolism categories, for which sanchytrids clustered with rozellids (Supplementary Fig. 4). We  
225 further pairwise-compared KEGG<sup>79</sup> orthologs of sanchytrids against *R. allomycis* and the



226 blastocladiomycete *A. macrogynus* (as representative of the sanchytrid closest canonical fungal  
227 relatives). The comparative metabolic maps of *A. gromovi* and *S. tribonematis* contained 1,222  
228 and 1,418 orthologous groups, respectively, whereas those of *R. allomycis* and *A. macrogynus*  
229 contained 845 and 4,860, respectively (Supplementary Fig. 5a-c). Blastocladiomycota and  
230 sanchytrids shared more similarities, including the maintenance of amino acid and nucleotide  
231 metabolism and energy production with a complete electron transport chain, which were largely  
232 lacking in *Rozella*<sup>9,13</sup>. Nonetheless, some reductive trend in energy production pathways could be  
233 observed in sanchytrid mitochondria, including the loss of ATP8, one F-type ATP synthase  
234 subunit, which is also absent or highly modified in several metazoans, including chaetognaths,  
235 rotifers, most bivalve molluscs, and flatworms<sup>80,81</sup>. *S. tribonematis* also lacked the NADH  
236 dehydrogenase subunit NAD4L (Supplementary Fig. 1), although this loss is unlikely to impact its  
237 capacity to produce ATP since *R. allomycis*, which lacks not only ATP8 but also the complete  
238 NADH dehydrogenase complex, still seems to be able to synthesize ATP<sup>9</sup>.

239 Most carbohydrate-related metabolic pathways were retained in sanchytrids and canonical  
240 fungi except for the galactose and inositol phosphate pathways, absent in both sanchytrids and  
241 *Rozella*. Nonetheless, sanchytrids displayed a rich repertoire of carbohydrate-degrading enzymes  
242 (Supplementary Figs. 6-10), most of them being likely involved in the degradation of algal cell  
243 walls required for their penetration into the host cells<sup>13,82,83</sup>. However, the most important  
244 difference between sanchytrids and canonical fungi concerned lipid metabolism, with the steroids  
245 and fatty acids metabolism missing in sanchytrids and also in *Rozella*<sup>9</sup> (Supplementary Fig. 5d-i).  
246 Collectively, our data suggest that, compared to Blastocladiomycota and other fungal relatives,  
247 sanchytrids have undergone a metabolic reduction that seems convergent with that observed in the  
248 phylogenetically distinct rozellid parasites.

249

## 250 **Convergent reductive flagellum evolution in Holomycota**

251 The loss of the ancestral opisthokont single posterior flagellum in Fungi<sup>84,85</sup> is thought to have  
252 facilitated their adaptation to land environments<sup>86</sup>. The number and timing of flagellum losses  
253 along the holomycotan branch remains to be solidly established. The flagellum is completely  
254 absent in nucleariids<sup>12,51</sup> but is found in representatives of all other major holomycotan clades,  
255 including rozellids<sup>87</sup>, aphelids<sup>10</sup>, and various canonical fungal groups, namely chytrids<sup>78</sup>,  
256 Blastocladiomycota<sup>88</sup>, *Olpidium*<sup>21,26</sup>, and sanchytrids<sup>35,36,45</sup>, although the latter are atypical.

257 Sanchytrid amoeboid zoospores have never been observed swimming, but glide on solid surfaces  
258 via two types of pseudopods: thin filopodia growing in all directions and a broad hyaline  
259 pseudopodium at the anterior end. The posterior flagellum, rather described as a pseudocilium,  
260 drags behind the cell without being involved in active locomotion<sup>35,36</sup>. Its basal body (kinetosome)  
261 and axoneme ultrastructure differ from that of most flagellated eukaryotes. Instead of the canonical  
262 kinetosome with 9 microtubule triplets and axonemes with 9 peripheral doublets + 2 central  
263 microtubules<sup>89</sup>, sanchytrids exhibit reduced kinetosomes (9 singlets in *S. tribonematis*; 9 singlets  
264 or doublets in *A. gromovi*) and axonemes (without the central doublet and only 4 microtubular  
265 singlets)<sup>35,36</sup>. Despite this substantial structural simplification, sanchytrid kinetosomes are among  
266 the longest known in eukaryotes, up to 2.2  $\mu\text{m}$ <sup>35,36</sup>. Such long but extremely simplified  
267 kinetosomes have not been reported in any other zoosporic fungi, including Blastocladiomycota<sup>90</sup>.  
268 Some of them, including *P. sedebokerense*<sup>91</sup>, branching early in our multi-gene phylogeny (Fig.  
269 1a), display amoeboid zoospores during the vegetative cycle, flagellated cells being most likely  
270 gametes<sup>90,92,93</sup>.

271 To better understand flagellar reduction and loss across Holomycota, we analysed 61  
272 flagellum-specific proteins on a well-distributed representation of 48 flagellated and non-  
273 flagellated species. Sanchytrids lacked several functional and maintenance flagellar components  
274 (Fig. 3a), namely axonemal dyneins, single-headed and double-headed inner arm dyneins, all  
275 intraflagellar transport proteins (IFT) of the group IFT-A and several of the group IFT-B.  
276 Sanchytrid kinetosomes also lost several components of the centriolar structure and tubulins,  
277 including Centrin2, involved in basal body anchoring<sup>94</sup>, and Delta and Epsilon tubulins, essential  
278 for centriolar microtubule assembly and anchoring<sup>95</sup>. These losses (Fig. 3b) explain why  
279 sanchytrids lack motile flagella. Cluster analyses based on the presence/absence of flagellar  
280 components (Supplementary Fig. 11) showed sanchytrids at an intermediate position between  
281 flagellated and non-flagellated lineages. Therefore, sanchytrids are engaged in an unfinished  
282 process of flagellum loss, thereby providing an interesting model to study intermediate steps of  
283 this reductive process.

284 In addition to sanchytrid reduction, between four and six independent flagellar losses have  
285 been inferred in Holomycota<sup>31</sup>. Our new, more robust phylogenetic framework (Fig. 1) allowed to  
286 infer only four independent flagellum losses, plus the ongoing one in sanchytrids (Fig. 3c). Three  
287 of them occurred at the base of high-rank taxa: nucleariids, Microsporidia and the

288 Zoopagomycota+Mucoromycota+Dikarya clade. The fourth loss occurred in *H. curvatum*, an  
289 atypical fungus originally classified as a colourless green alga<sup>14</sup> and later reclassified within the  
290 Monoblepharidomycota<sup>26,96</sup>. The fourth one concerned *Olpidium*, which our phylogenomic  
291 analysis robustly placed as an independent lineage sister to major non-flagellated fungal taxa (Fig.  
292 1b). Although *Olpidium* has a functional flagellum, its flagellar toolkit is reduced, lacking Delta  
293 and Epsilon tubulins and several dyneins (Fig. 3c). This suggests that, analogously to sanchytrids,  
294 Olpidiomycota represent an intermediate stage between zoosporic fungi possessing fully  
295 functional flagella and flagellum-lacking fungi. This would be consistent with observations that  
296 Zoopagomycota, the first lineage diverging after Olpidiomycota, possess a degenerated 9+2  
297 microtubular system as potential remnant of the ancestral flagellum<sup>97-99</sup>. Our data support a global  
298 scenario of major progressive reduction of the flagellar toolkit from *Olpidium* to Dikarya, with a  
299 few additional punctual independent losses or reductions in some distant branches of the fungal  
300 tree (*H. curvatum* and sanchytrids). In addition, a putative fifth independent loss in Holomycota  
301 might have occurred in the Nephridiophagida, a clade of fungal parasites of insects and  
302 myriapods<sup>100,101</sup> without clear affinity with established fungal clades<sup>101</sup>. Recently, a possible  
303 relationship to chytrids has been suggested<sup>102</sup>. Genomic or transcriptomic data should clarify their  
304 phylogenetic position in the future.

305

### 306 **Fungal “vision” and flagellum exaptation**

307 Why do sanchytrids retain a non-motile flagellum with a long kinetosome? Since the primary  
308 flagellar function has been lost in favour of amoeboid movement, other selective forces must be  
309 acting to retain this atypical structure for a different function in zoospores. In bacteria, the  
310 exaptation of the flagellum for new roles in mechanosensitivity<sup>103,104</sup> and wetness sensing<sup>105</sup> has  
311 been documented. Microscopy observations of sanchytrid cultures showed that the flagellum is  
312 rather labile and can be totally retracted within the cell cytoplasm, the long kinetosome likely being  
313 involved in this retraction capability<sup>35,36</sup>. Interestingly, a conspicuous curved rosary chain of lipid  
314 globules has been observed in the kinetosome vicinity in *A. gromovi* zoospores, often close to  
315 mitochondria<sup>35,36</sup>. In the blastocladiomycete *B. emersonii*, similar structures tightly associated with  
316 mitochondria are known as "side-body complexes"<sup>106</sup>. *B. emersonii* possesses a unique bacterial  
317 type-1-rhodopsin+guanylyl cyclase domain fusion (BeGC1, 626 amino acids) which, together with  
318 a cyclic nucleotide-gated channel (BeCNG1), control zoospore phototaxis in response to cGMP

319 levels after exposure to green light<sup>107</sup>. BeGC1 was localized by immunofluorescence on the  
320 external membrane of the axoneme-associated lipid droplets, which function as an eyespot at the  
321 base of the flagellum and control its beating<sup>107–109</sup>. The BeGC1 fusion and the channel BeCNG1  
322 proteins have also been found in other Blastocladiomycota (*A. macrogynus* and *C. anguillulae*).

323 Both *A. gromovi* and *S. tribonematis* possessed the BeGC1 fusion (532 and 535 amino  
324 acids, respectively) and the gated channel BeCNG1 (Supplementary Fig. 12a-c). We also found  
325 the BeGC1 fusion in the newly available Blastocladiomycota genome and transcriptome sequences  
326 of *P. sedebokerense* and *C. lativittatus*. Therefore, this fusion constitutes a synapomorphy for the  
327 Blastocladiomycota+Sanchytriomycota clade. However, we found the BeCNG1 channel in *C.*  
328 *lativittatus* but not in *P. sedebokerense*, suggesting that this species probably uses a different way  
329 to finish the cGMP cascade reaction (Supplementary Fig. 12c). Despite some ultrastructural  
330 differences, and although functional studies need to confirm their role, the presence of lipid threads  
331 in the vicinity of the kinetosome and mitochondria, together with BeGC1/BeCNG1 homologs in  
332 *Amoeboradix* and *Sanchytrium* tentatively suggest a comparable light-sensing organelle in  
333 sanchytrids. We hypothesize that, as in *B. emersonii*, the sanchytrid reduced flagellum could be  
334 involved in phototactic response, at least as an structural support for the lipid vacuoles.  
335 Interestingly, sanchytrids showed considerably shorter branches in rhodopsin and guanylyl cyclase  
336 domain phylogenetic trees (Supplementary Fig. 12) than in multi-gene phylogenies (Fig. 1),  
337 indicating that these proteins (and their functions) are subjected to strong purifying selection as  
338 compared to other proteins in their genomes.

339 Since rhodopsins capture light by using the chromophore retinal<sup>110</sup>, we looked for a set of  
340 carotenoid ( $\beta$ -carotene) biosynthesis enzymes<sup>107,111</sup> necessary for retinal production. Surprisingly,  
341 the enzymes involved in the classical pathway (bifunctional lycopene cyclase/phytoene synthase,  
342 phytoene dehydrogenase and carotenoid oxygenase)<sup>107,111</sup> were missing in both sanchytrid  
343 genomes, suggesting that they are not capable of synthesize their own retinal (Supplementary  
344 Table 4). We only detected two enzymes (isopentenyl diphosphate isomerase and farnesyl  
345 diphosphate synthase) that carry out early overlapping steps of both sterol and carotenoid  
346 biosynthesis. By contrast, the  $\beta$ -carotene biosynthesis pathway is widely distributed in Fungi,  
347 including chytrids and Blastocladiomycota (*Allomyces* and *Blastocladiella*<sup>107,112</sup>, and also in *P.*  
348 *sedebokerense* and *C. lativittatus*, Supplementary Table 4). Therefore, sanchytrids, like most  
349 heterotrophic eukaryotes, seem unable to synthesize  $\beta$ -carotene and must obtain carotenoids

350 through their diet<sup>111</sup>. Indeed, we detected all carotenoid and retinal biosynthesis pathway genes in  
351 the transcriptome of the yellow-brown alga *Tribonema gayanum*, (Supplementary Table 4), their  
352 host and likely retinal source during infection.

353

### 354 **Evolution of multicellularity in Holomycota**

355 Fungal multicellularity results from connected hyphae<sup>113</sup>. Diverse genes involved in hyphal  
356 multicellularity were present in the ancestors of three lineages of unicellular fungi  
357 (Blastocladiomycota, Chytridiomycota and Zoopagomycota; BCZ nodes)<sup>114</sup>. To ascertain whether  
358 they were also present in other deep-branching Holomycota with unicellular members, we  
359 reconstructed the evolutionary history of 619 hyphal morphogenesis proteins<sup>114</sup>, grouped into 10  
360 functional categories (see Methods; Supplementary Table 5; Supplementary Fig. 13). Our results  
361 showed that most hyphal morphogenesis genes were not only present in the fungal ancestor but  
362 also in their unicellular holomycotan relatives, indicating that they evolved well before the origin  
363 of fungal multicellularity (Fig. 4a). This pattern could be observed for all functional categories  
364 with the clear exception of the adhesion proteins, most of which only occur in Dikarya (Supplementary  
365 Fig. 13), reinforcing previous conclusions that adhesion proteins played a marginal role in the early  
366 evolution of hyphae<sup>114</sup>.

367 The ancestor of *Olpidium* and the multicellular fungi clade possessed a high percentage of  
368 hyphae-related proteins (88.4%, node O in Fig. 4a), similarly to the ancestor of sanchytrids and  
369 Blastocladiomycota (82%), though this ancestral repertoire became secondarily reduced in  
370 sanchytrids (65.9%). Likewise, many yeasts, which are also secondarily reduced organisms,  
371 retained most of the genetic repertoire needed for hyphal development. Many of these proteins  
372 were also present in nucleariids, Rozellida-Microsporidia and Aphelida (nodes N, R, and A in Fig.  
373 4a and Supplementary Table 6; NRA nodes). Clustering analysis based on the presence/absence  
374 of hyphal morphogenesis proteins did not clearly segregate unicellular and multicellular lineages  
375 (Fig. 4b) and retrieved very weak intragroup correlation (Fig. 4c). Our results extend previous  
376 observations of hyphal morphogenesis genes from Fungi<sup>114</sup> to much more ancient diversifications  
377 in the Holomycota. The holomycotan ancestor already possessed a rich repertoire of proteins,  
378 notably involved in 'actin cytoskeleton' and 'microtubule-based transport', that were later  
379 recruited for hyphal production (Supplementary Table 6). Most innovation concerned the proteins  
380 involved in the 'cell wall biogenesis/remodeling' and 'transcriptional regulation' functional

381 categories, which expanded since the common ancestor of Aphelida and Fungi. This pattern is  
382 consistent with the enrichment of gene duplications in these two categories observed in all major  
383 fungal lineages<sup>114</sup>. Nevertheless, genome and transcriptome data remain very scarce for the  
384 Aphelida and we expect that part of these duplications will be inferred to be older when more data  
385 for this sister lineage of Fungi become available.

386

## 387 **Conclusions**

388 We generated the first genome sequence data for the two known species of sanchytrids, a group of  
389 atypical fungal parasites of algae. The phylogenetic analysis of 264 conserved proteins showed  
390 that they form a new fungal phylum, the Sanchytriomycota, sister to the Blastocladiomycota. Our  
391 phylogenetic analysis also provided strong support for Chytridiomycota being the sister group of  
392 all other fungi and confirmed the position of the enigmatic flagellated fungus *Olpidium* as sister  
393 of the main group of non-flagellated fungi (Zoopagomycota+Mucoromycota+Dikarya).  
394 Sanchytrids have a complex life cycle that includes a flagellated phase (zoospores) with non-motile  
395 flagella that are engaged in an ongoing reductive process. The inclusion of both, other zoosporic  
396 (e.g., *Olpidium*) and non-flagellated (e.g., the chytrid *H. curvatum*), fungi in our multi-gene  
397 phylogeny allowed the inference of four independent flagellum losses across Holomycota.  
398 Interestingly, the sanchytrid residual flagellum endowed with a long kinetosome might represent  
399 an exaptation of this structure as support for a lipid organelle putatively involved in light sensing.  
400 Our taxon-rich dataset of deep-branching Holomycota also provided evidence for a very ancient  
401 origin of most genes related to hyphal morphogenesis, well before the evolution of the  
402 multicellular fungal lineages.

403

## 404 **Taxonomic appendix**

### 405 **Sanchytriomycota phyl. nov.**

406 Monocentric thallus, epibiotic; usually amoeboid zoospores with longest-known kinetosome in  
407 fungi and immobile pseudocilium; centrosome in sporangium with two centrioles composed by  
408 nine microtubular singlets.

409 Class **Sanchytriomycetes** (Tedersoo et al. 2018)<sup>34</sup> emend.

410 Diagnosis as for the phylum.

411 Order **Sanchytriales** (Tedersoo et al. 2018)<sup>34</sup> emend.

412 Diagnosis as for the phylum.

413 Family **Sanchytriaceae** (Karpov & Aleoshin, 2017)<sup>45</sup> emend.

414 Amoeboid zoospores with anterior lamellipodium producing subfilopodia, and lateral and  
415 posterior filopodia; with (rarely without) posterior pseudocilium; kinetosome composed of nine  
416 microtubule singlets or singlets/doublets, 1–2  $\mu\text{m}$  in length. Zoospores attach to algal cell wall,  
417 encyst, and penetrate host wall with a short rhizoid. Interphase nuclei in sporangia have a  
418 centrosome of two centrioles composed of nine microtubular singlets. Predominantly parasites of  
419 freshwater algae.

420 Type: **Sanchytrium** (Karpov et Aleoshin 2017<sup>45</sup>) emend. Karpov, 2019<sup>36</sup>.

421 Parasite of algae. Epibiotic, spherical to ovate, sporangia with one (rarely more) discharge papillae.  
422 Amoeboid zoospores with anterior lamellipodium; with (rarely without) pseudocilium; contains  
423 kinetosome composed of nine single microtubules 1–1.2  $\mu\text{m}$  in length. Interphase nuclei in  
424 sporangia have a centrosome with two orthogonal centrioles composed of nine microtubular  
425 singlets and with an internal fibrillar ring.

426 Type: *Sanchytrium tribonematis* (Karpov et Aleoshin, 2017<sup>45</sup>) emend. Karpov, 2019<sup>36</sup>.

427 *Sanchytrium tribonematis* (Karpov et Aleoshin, 2017<sup>45</sup>) emend. Karpov, 2019<sup>36</sup>.

428 Round to ovate smooth sporangium, ~10  $\mu\text{m}$  diameter, without or with one discharge papilla;  
429 sessile on algal surface. Slightly branched rhizoid, almost invisible inside host. Amoeboid  
430 zoospores 5.4 - 3.3  $\mu\text{m}$  (maximum) with anterior lamellipodium producing subfilopodia, lateral  
431 and posterior filopodia; normally with posterior pseudocilium up to 5  $\mu\text{m}$  in length supported by  
432 up to four microtubules.

433 *Amoeboradix* Karpov, López-García, Mamkaeva & Moreira, 2018<sup>35</sup>.

434 Zoosporic fungus with monocentric, epibiotic sporangia and amoeboid zoospores having posterior  
435 pseudocilium that emerges from long kinetosome (ca. 2  $\mu\text{m}$ ) composed of microtubular singlets  
436 or doublets.

437 Type species: *A. gromovi* Karpov, López-García, Mamkaeva & Moreira, 2018<sup>35</sup>.

438 *A. gromovi* Karpov, López-García, Mamkaeva & Moreira, 2018<sup>35</sup>.

439 Amoeboid zoospores of 2-3×3-4 µm with posterior pseudocilium up to 8 µm in length, which can  
440 be totally reduced; kinetosome length, 1.8-2.2 µm. Sporangia of variable shape, from pear-shaped  
441 with rounded broad distal end and pointed proximal end to curved asymmetrical sac-like 8-10 µm  
442 width 16-18 µm long with prominent rhizoid and 2-3 papillae for zoospore discharge; spherical  
443 cysts about 3-4 µm in diameter; resting spore is ovate thick walled 12×6 µm. Parasite of *Tribonema*  
444 *gayanum*, *T. vulgare* and *Ulothrix tenerrima*.

445

## 446 **Methods**

447 **Biological material.** *Sanchytrium tribonematis* strain X-128 and *Amoeboradix gromovi* strain X-  
448 113, isolated from freshwater sampling locations in Russia<sup>35,36</sup>, were maintained in culture with  
449 the freshwater yellow-green alga *Tribonema gayanum* Pasch. strain 20 CALU as host<sup>45</sup>. The algal  
450 host was grown in mineral freshwater medium at room temperature under white light. After  
451 inoculation with *Sanchytrium* or *Amoeboradix*, cultures were incubated for 1–2 weeks to reach the  
452 maximum infection level. We then collected both individual zoospores and sporangia full of  
453 moving zoospores by micromanipulation with an Eppendorf PatchMan NP2 micromanipulator  
454 using 19 µm VacuTip microcapillaries (Eppendorf) on an inverted Leica DIII3000 B microscope.  
455 Zoospores and sporangia were then washed 2 times in clean sterile water drops before storing them  
456 into individual tubes for further analyses.

457

458 **Whole genome amplification and sequencing.** DNA extraction from single zoospores and  
459 sporangia was done with the PicoPure kit (Thermo Fisher Scientific) according to the  
460 manufacturer's protocol. Whole genome amplification (WGA) was carried out by multiple  
461 displacement amplification with the single-cell REPLI-g kit (QIAGEN). DNA amplification was  
462 quantified using a Qubit fluorometer (Life Technologies). We retained WGA products that yielded  
463 high DNA concentration and for which we were able to obtain sanchytrid 18S rRNA gene  
464 amplicons by PCR. As expected, WGA from sporangia (many zoospores per sporangium) yielded  
465 more DNA than individual zoospores and were selected for sequencing (K1-9\_WGA for *A.*  
466 *gromovi*; SC-2\_WGA for *S. tribonematis*). TruSeq paired-end single-cell libraries were prepared  
467 from these samples and sequenced on a HiSeq 2500 Illumina instrument (2 x 100 bp) with v4



468 chemistry. We obtained 121,233,342 reads (26,245 Mbp) for *A. gromovi* and 106,922,235 reads  
469 (21,384 Mbp) for *S. tribonematis*.

470

471 **Genome sequence assembly, decontamination and annotation.** Paired-end read quality was  
472 assessed with FastQC<sup>115</sup> before and after quality trimming. Illumina adapters were removed with  
473 Trimmomatic v0.32 in Paired-End mode<sup>116</sup>, with the following parameters:  
474 ILLUMINACLIP:adapters.fasta:2:30:10LEADING:28 TRAILING:28 SLIDINGWINDOW:4:30.  
475 Trimmed paired-end reads were assembled using SPAdes 3.9.1 in single-cell mode<sup>117</sup>. This  
476 produced assemblies of 48.7 and 37.1 Mb with 8,420 and 8,015 contigs for *A. gromovi* and *S.*  
477 *tribonematis*, respectively. The decontamination of contaminant prokaryotic contigs was carried  
478 out by a three-step process. First, genome sequences were subjected to two rounds of assembly,  
479 before and after bacterial sequence removal with BlobTools v0.9.19<sup>118</sup>. Second, open-reading  
480 frames were predicted and translated from the assembled contigs using Transdecoder v2  
481 (<http://transdecoder.github.io>) with default parameters and Cd-hit v4.6<sup>119</sup> with 100% identity to  
482 produce protein sequences for *A. gromovi* and *S. tribonematis*. Finally, to remove possible  
483 eukaryotic host (*Tribonema*) contamination, the predicted protein sequences were searched by  
484 BLASTp<sup>120</sup> against two predicted yellow-green algae proteomes inferred from the *Tribonema*  
485 *gayanum* transcriptome<sup>13</sup> and the *Heterococcus* sp. DN1 genome (PRJNA210954) (also member  
486 of the Tribonematales). We excluded sanchytrid hits that were 100% or >95% identical to them,  
487 respectively. Statistics of the final assembled genomes were assessed with QUAST 4.5<sup>121</sup> and  
488 Qualimap v2.2.1<sup>122</sup> for coverage estimation. In total, we obtained 7,220 and 9,368 protein  
489 sequences for *A. gromovi* and *S. tribonematis*, respectively (Table 1). To assess genome  
490 completeness, we used BUSCO v2.0.1<sup>40</sup> on the decontaminated predicted proteomes with the  
491 fungi\_odb9 dataset of 290 near-universal single-copy orthologs. The inferred proteins were  
492 functionally annotated with eggNOG mapper<sup>72</sup> using DIAMOND as the mapping mode and the  
493 eukaryotic taxonomic scope. This resulted in 3,757 (*A. gromovi*) and 4,670 (*S. tribonematis*)  
494 functionally annotated peptides for the predicted proteomes (Supplementary Table 1). The  
495 mitochondrial genomes of both sanchytrids were identified in single contigs using Blast<sup>123</sup> and  
496 annotated with MITOS<sup>124</sup>. Additional Blast searches were made to confirm missing proteins.

497

498 **Phylogenomic analyses and single-gene phylogenies.** A revised version of a 264 protein dataset  
499 (termed GBE)<sup>47</sup> was used to reconstruct phylogenomic trees<sup>13,51</sup>. This dataset was updated with  
500 sequences from the two sanchytrid genomes, the non-flagellated chytrid *Hyaloraphidium*  
501 *curvatum* SAG235-1 (SRX4387575), the enigmatic flagellated fungus *Olpidium bornovanus* UBC  
502 F19785 (SRX125102, SRX123912, SRX123911), and all publicly available Blastocladiomycota  
503 sequences, including the recently sequenced *Paraphysoderma sadebokerense* JEL821  
504 (SRX3538887) and *Coelomomyces lativittatus* CIRM-AVA-1 (SRX2781572). Sequences were  
505 obtained from GenBank (<http://www.ncbi.nlm.nih.gov/genbank>, last accessed November, 2019),  
506 and the Joint Genome Institute (<http://www.jgi.doe.gov/>; last accessed May 2017). Our updated  
507 taxon sampling comprises a total of 81 Opisthokonta (2 Holozoa and 79 Holomycota), 2  
508 Amoebozoa and 1 Apusomonadida. Two datasets with two different taxon samplings were  
509 prepared, one with all 84 species (GBE84) and one without the long-branching core Microsporidia  
510 and metchnikovellids for a total of 69 species (GBE69).

511 The 264 proteins were searched in the new species with tBLASTn<sup>120</sup>, incorporated into the  
512 individual protein datasets, aligned with MAFFT v7<sup>125</sup> and trimmed with TrimAl with the  
513 automated1 option<sup>126</sup>. Alignments were visualized, manually edited and concatenated with  
514 Geneious v6.0.6<sup>127</sup> and single gene trees obtained with FastTree v2.1.7<sup>128</sup> with default parameters.  
515 Single gene trees were manually checked to identify and remove paralogous and/or contaminating  
516 sequences. The concatenation of the clean trimmed 264 proteins resulted in alignments containing  
517 91,768 (GBE69) and 83,321 (GBE84) amino acid positions. Bayesian inference (BI) phylogenetic  
518 trees were reconstructed using PhyloBayes-MPI v1.5<sup>129</sup> under CAT-Poisson model, two MCMC  
519 chains for each dataset were run for more than 15,000 generations, saving one every 10 trees.  
520 Analyses were stopped once convergence thresholds were reached (i.e. maximum discrepancy  
521 <0.1 and minimum effective size >100, calculated using bpcomp) and consensus trees constructed  
522 after a burn-in of 25%. Maximum likelihood (ML) phylogenetic trees were inferred with IQ-TREE  
523 v1.6<sup>130</sup> under the LG + R9 + PMSF model for GBE69 and LG + F+ R10 + PMSF for GBE84,  
524 selected with the IQ-TREE TESTNEW algorithm as per the Bayesian information criterion (BIC).  
525 Statistical support was generated with 1000 ultrafast bootstraps<sup>131</sup> and 1,000 replicates of the SH-  
526 like approximate likelihood ratio test<sup>132</sup>. All trees were visualized with FigTree<sup>133</sup>.

527 To test alternative tree topologies we used Mesquite<sup>134</sup> to constrain the following  
528 topologies: 1) chytrids as sister lineage of all other fungi (Blastocladiomycota + Sanchytriomycota

529 + *Olpidium* + Zygomycota + Dikarya), 2) Blastocladiomycota + Sanchytriomycota as sister  
530 lineage of all other fungi (Chytridiomycota + *Olpidium* + Zygomycota + Dikarya), and 3)  
531 *Olpidium* as an independent lineage sister of all other non-flagellated fungi (Zygomycota +  
532 Dikarya) or belonging within Zoopagomycota. The constrained topologies without branch lengths  
533 were reanalysed with the -g option of IQ-TREE and the best-fitting model. AU tests were carried  
534 out on the resulting trees for each taxon sampling with the -z and -au options of IQ-TREE.  
535 Additionally, to minimize possible systematic bias due to the inclusion of fast-evolving sites in  
536 our protein alignments, we progressively removed the fastest evolving sites, 5% of sites at a time.  
537 For that, among-site substitution rates were inferred using IQ-TREE under the -wsr option and the  
538 best-fitting model for both taxon samplings for a total of 19 new data subsets of each  
539 (Supplementary Table 2). We then reconstructed phylogenetic trees for all these subsets using IQ-  
540 TREE with the same best-fitting model as for the whole dataset. To assess the support of the  
541 alternative topologies in the bootstrapped trees, we used CONSENSE from the PHYLIP  
542 package<sup>135</sup> and interrogated the UFBOOT file using a Python script (M. Kolisko, pers. comm).  
543 Finally, to remove possible compositional heterogeneity within our data, we used the Dayhoff  
544 recoding scheme (from 20 to 4 categories) using an in-house Python script. We then reconstructed  
545 phylogenetic trees for all the recoded subsets using IQ-TREE with the GTR+F+I+G4 model for  
546 ML trees and PhyloBayes-MPI v1.5 with the CAT-Poisson model for BI trees.

547

548 **Comparative analysis of primary metabolism.** To get insights into the metabolic capabilities of  
549 sanchytrids in comparison with other Holomycota we carried out statistical multivariate analyses.  
550 Protein sets used in this study were obtained between May 2017 and November 2019 from the  
551 NCBI protein, genome and SRA databases (<https://www.ncbi.nlm.nih.gov/>), except the following:  
552 *Spizellomyces punctatus*, *Gonapodya prolifera*, *Batrachochytrium dendrobatidis*, *Allomyces*  
553 *macrogynus*, *Catenaria anguillulae* and *Blastocladiella britannica*, retrieved from the MycoCosm  
554 portal of the Joint Genome Institute (these sequence data were produced by the US Department of  
555 Energy Joint Genome Institute <http://www.jgi.doe.gov/> in collaboration with the user community)  
556 and *Parvularia atlantis* (previously *Nuclearia* sp. ATCC50694, from  
557 <https://doi.org/10.6084/m9.figshare.3898485.v4>). We searched in both sanchytrids 1206 eggNOG  
558 orthologous groups<sup>72</sup> corresponding to 8 primary metabolism categories (Gene Ontology, GO).  
559 The correspondence between GO terms and primary metabolism COGs used are the following:

560 [C] Energy production and conversion (227 orthologs); [G] Carbohydrate transport and  
561 metabolism (205 orthologs); [E] Amino acid transport and metabolism (200 orthologs); [F]  
562 Nucleotide transport and metabolism (87 orthologs); [H] Coenzyme transport and metabolism (94  
563 orthologs); [I] Lipid transport and metabolism (201 orthologs); [P] Inorganic ion transport and  
564 metabolism (153 orthologs); and [Q] Secondary metabolites biosynthesis, transport and catabolism  
565 (70 orthologs). From these categories, we identified 1158 orthologs non-redundant among  
566 categories in the sanchytrid genomes which were shared among a set of 45 species, including 8  
567 opisthosporidians, 30 fungi, 2 holozoans, 2 amoebozoans, and 1 apusomonad (for the complete  
568 list, see Supplementary Table 3). We annotated the protein sets of these 45 species using eggNOG-  
569 mapper<sup>72</sup> with DIAMOND as mapping mode and the eukaryotic taxonomic scope. All ortholog  
570 counts were transformed into a presence/absence matrix (encoded as 0/1) and analysed with the R  
571 script<sup>136</sup> detailed in Torruella et al. (2018) in which similarity values between binary COG profiles  
572 of all species were calculated to create a complementary species-distance matrix. We then analysed  
573 this distance matrix using a Principal Coordinate Analysis (PCoA) and plotted binary COG profiles  
574 in a presence/absence heatmap. Clustering of the species and orthologs was done by Ward  
575 hierarchical clustering (on Euclidean distances for orthologs) of the interspecific Pearson  
576 correlation coefficients. The raw species clustering was also represented in a separate pairwise  
577 correlation heatmap colour-coded to display positive Pearson correlation values (0–1). Finally,  
578 COG categories of each primary metabolism were also analysed separately (categories C, E, F, G,  
579 H, I, P, and Q) using the same workflow (for more details see Torruella et al. 2018 and  
580 <https://github.com/xgrau/paraphelidium2018>). We compared in more detail the inferred  
581 metabolism of a subset of species (the two sanchytrids, *Rozella allomycis* and *Allomyces*  
582 *macrognus*). The annotation of these proteomes was done using BlastKOALA<sup>137</sup>, with eukaryotes  
583 as taxonomy group and the genus\_eukaryotes KEGG GENES database, and the annotations  
584 uploaded in the KEGG Mapper Reconstruct Pathway platform<sup>79</sup> by pairs. First, we compared the  
585 two sanchytrid proteomes to confirm their similarity and, second, we compared them with the  
586 proteomes of *R. allomycis* and *A. macrognus* to study their metabolic reduction.

587

588 **Homology searches and phylogenetic analysis of specific proteins.** To assess the evolution of  
589 the flagellum in holomycotan lineages we used a dataset of over 60 flagellum-specific proteins  
590 <sup>85,138–140</sup> to examine a total of 47 flagellated and non-flagellated species within and outside the

591 Holomycota. The flagellar toolkit proteins were identified using *Homo sapiens* sequences as Blast  
592 queries. Candidate proteins were then blasted against the non-redundant GenBank database to  
593 confirm their identification and submitted to phylogenetic analysis by multiple sequence alignment  
594 with MAFFT<sup>125</sup>, trimming with TrimAl<sup>126</sup> with the automated1 option, and tree reconstruction  
595 with FastTree<sup>128</sup>. After inspection of trees, we removed paralogs and other non-orthologous protein  
596 sequences. We excluded the proteins with no identifiable presence in any of the 47 species used in  
597 the analysis and encoded the presence/absence of the remaining ones in a 1/0 matrix. The native  
598 R heatmap function<sup>136</sup> was used to plot the flagellar proteome comparison between all species  
599 according to their presence/absence similarity profiles. To study the presence or absence of the  
600 fusion of the BeGC1 and BeCNG1 light-sensing proteins, we blasted them against the proteomes  
601 of *S. tribonematis*, *A. gromovi*, *P. sedebokerense* and *C. lativittatus* using the *Blastocladiella*  
602 *emersonii* sequences (BeGC1: AIC07007.1; BeCNG1: AIC07008.1) as queries. We used MAFFT  
603 to include the new sequences in a multiple sequence alignment for the BeCNG1 protein channel  
604 and separately for both the guanylyl-cyclase GC1 domain and the rhodopsin domain of the BeGC1  
605 fusion protein<sup>107</sup>. After trimming with TrimAl we reconstructed phylogenetic trees for the three  
606 datasets using IQ-TREE with the best-fitting models: LG+F+I+G4 for the rhodopsin domain and  
607 BeCNG1, and LG+G4 model for BeGC1. The resulting trees were visualized with FigTree<sup>133</sup>. To  
608 study the possible presence of a carotenoid synthesis pathway for retinal production in sanchytrids,  
609 we combined previous datasets for carotenoid biosynthesis and cleavage enzymes from one giant  
610 virus (ChoanoV1), two choanoflagellates and two haptophytes<sup>111</sup>, together with the carotenoid  
611 biosynthesis enzymes found in *B. emersonii*<sup>107</sup>. This dataset also included three enzymes for early  
612 sterol and carotenoid biosynthesis (isoprenoid biosynthesis steps). The protein sequences from this  
613 dataset were blasted (BLASTp) against the two sanchytrid proteomes and their host *Tribonema*  
614 *gayanum* proteome. Results were confirmed by blasting the identified hits to the NCBI non-  
615 redundant protein sequence database. To study the presence of proteins involved in cell-wall  
616 penetration in sanchytrids (including cellulases, hemicellulases chitinases and pectinases), we used  
617 the complete mycoCLAP database of carbohydrate-degrading enzymes  
618 (<https://mycoclap.fungalgenomics.ca/mycoCLAP/>). We blasted this database against our two  
619 sanchytrid proteomes and other five close representatives of Blastocladiomycota and four  
620 Chytridiomycota. We then screened for canonical cellulose, hemicellulose, pectin and chitin  
621 degrading enzymes identified in Fungi from previous studies<sup>13,141,142</sup>. The identified hits were

622 blasted back to both the NCBI non-redundant protein sequence database and the CAZy database  
623 ([cazy.org](http://cazy.org)) to create a dataset for phylogenetic reconstruction for each enzyme. In some cases, we  
624 added the identified sequences to specific protein datasets from previous studies. For cellulases,  
625 we updated a previous aphelid dataset<sup>13</sup>, and for the chitin degradation proteins we updated  
626 previous datasets of GH20  $\beta$ -N-acetylhexosaminidase (NAGase)<sup>83</sup> and GH18 chitinase<sup>82</sup>. Proteins  
627 were aligned with MAFFT<sup>125</sup> and trimmed from gaps and ambiguously aligned sites using  
628 TrimAl<sup>126</sup> with the automated1 algorithm. ML trees were inferred using IQ-TREE<sup>130</sup> with the best-  
629 fitting model selected with the IQ-TREE TESTNEW algorithm as per BIC. The best-scoring tree  
630 was searched for up to 100 iterations, starting from 100 initial parsimonious trees; statistical  
631 supports were generated from 1000 ultra-fast bootstrap replicates and 1000 replicates of the SH-  
632 like approximate likelihood ratio test. Trees were visualized with FigTree<sup>133</sup>.

633

634 **Analyses of hyphae multicellularity-related genes.** We used a dataset of 619 hyphal  
635 multicellularity-related proteins belonging to 362 gene families<sup>114</sup>. These gene families were  
636 grouped into 10 functional categories: actin cytoskeleton (55 proteins), adhesion (30), polarity  
637 maintenance (107), cell wall biogenesis/remodeling (92), septation (56), signaling (82),  
638 transcriptional regulation (51), vesicle transport (103), microtubule-based transport (32) and cell  
639 cycle regulation (11). The 619 proteins were searched by BLAST in the GBE69 dataset proteome  
640 and later incorporated into individual gene family protein alignments with MAFFT v7<sup>125</sup>. After  
641 trimming with TrimAl<sup>126</sup> with the automated1 option, alignments were visualized with Geneious  
642 v6.0.6<sup>127</sup> and single gene trees obtained with FastTree<sup>128</sup> with default parameters. Single protein  
643 trees were manually checked to identify paralogous sequences and confirm the presence of genes  
644 within large gene families. Presence/absence of genes was binary coded (0/1) for each species and  
645 the resulting matrix processed with a specific R script<sup>13</sup>. Finally, we reconstructed the  
646 multicellularity-related gene gain/loss dynamics by applying the Dollo parsimony method  
647 implemented in Count<sup>143</sup>. These analyses were done on both the complete dataset of all hyphae  
648 multicellularity-related genes and on 10 separate datasets corresponding to the functional  
649 categories mentioned above.

650

651 **Data availability**

652 The raw sequence data and assembled genomes generated in this work have been deposited at the  
653 National Center for Biotechnology Information (NCBI) sequence databases under Bioprojects  
654 PRJNA668693 and PRJNA668694.

655

### 656 **Acknowledgments**

657 We thank the UNICELL single-cell genomics platform (<https://www.deemteam.fr/en/unicell>).  
658 This work was funded by the European Research Council Advanced Grants “ProtistWorld” (No.  
659 322669, P.L.-G.) and Plast-Evol (No. 787904, D.M.) and the Horizon 2020 research and  
660 innovation program under the Marie Skłodowska-Curie ITN project SINGEK  
661 (<http://www.singek.eu/>; grant agreement No. H2020-MSCA-ITN-2015-675752, L.J.G. & P.L.-  
662 G.). S.A.K. contribution was supported by the RSF grant No. 16-14-10302.

663

### 664 **Author contributions**

665 P.L.-G. and D.M. conceived and supervised the study. S.A.K. and D.M. prepared the biological  
666 material; L.J.G., G.T. and D.M. analysed the sequence data; L.J.G., P.L.-G. and D.M. supervised  
667 the study and wrote the manuscript, which was edited and approved by all authors.

668

### 669 **Competing interests**

670 The authors declare no competing interests.

671

672 **Correspondence and requests for materials** should be addressed to L.J.G or D.M.

673

### 674 **References**

- 675 1. Cavalier-Smith, T. A revised six-kingdom system of life. *Biol. Rev. Camb. Philos. Soc.* **73**, 203–266  
676 (1998).
- 677 2. Douzery, E. J. P., Snell, E. A., Baptiste, E., Delsuc, F. & Philippe, H. The timing of eukaryotic  
678 evolution: Does a relaxed molecular clock reconcile proteins and fossils? *Proc. Natl. Acad. Sci. U.*  
679 *S. A.* (2004) doi:10.1073/pnas.0403984101.
- 680 3. Parfrey, L. W., Lahr, D. J. G., Knoll, A. H. & Katz, L. A. Estimating the timing of early eukaryotic  
681 diversification with multigene molecular clocks. *Proc. Natl. Acad. Sci. U. S. A.* (2011)  
682 doi:10.1073/pnas.1110633108.
- 683 4. Eme, L., Sharpe, S. C., Brown, M. W. & Roger, A. J. On the age of eukaryotes: Evaluating evidence

- 684 from fossils and molecular clocks. *Cold Spring Harb. Perspect. Biol.* **6**, 1–16 (2014).
- 685 5. Berbee, M. L., James, T. Y. & Strullu-Derrien, C. Early diverging fungi: Diversity and impact at the  
686 dawn of terrestrial life. *Annu. Rev. Microbiol.* **71**, 41–60 (2017).
- 687 6. Spatafora, J. W. *et al.* The Fungal Tree of Life: from molecular systematics to genome-scale  
688 phylogenies. *Microbiol. Spectr.* **5**, 1–32 (2017).
- 689 7. Lara, E., Moreira, D. & López-García, P. The environmental clade LKM11 and *Rozella* form the  
690 deepest branching clade of Fungi. *Protist* **161**, 116–121 (2010).
- 691 8. Jones, M. D. M. *et al.* Discovery of novel intermediate forms redefines the fungal tree of life. *Nature*  
692 (2011) doi:10.1038/nature09984.
- 693 9. James, T. Y. *et al.* Shared signatures of parasitism and phylogenomics unite cryptomycota and  
694 microsporidia. *Curr. Biol.* **23**, 1548–1553 (2013).
- 695 10. Karpov, S. A. *et al.* Morphology, phylogeny, and ecology of the aphelids (Aphelidea, Opisthokonta)  
696 and proposal for the new superphylum Opisthosporidia. *Frontiers in Microbiology* (2014)  
697 doi:10.3389/fmicb.2014.00112.
- 698 11. Haag, K. L. *et al.* Evolution of a morphological novelty occurred before genome compaction in a  
699 lineage of extreme parasites. *Proc. Natl. Acad. Sci.* **111**, 15480–15485 (2014).
- 700 12. Bass, D. *et al.* Clarifying the Relationships between Microsporidia and Cryptomycota. *J. Eukaryot.*  
701 *Microbiol.* **65**, 773–782 (2018).
- 702 13. Torruella, G. *et al.* Global transcriptome analysis of the aphelid *Paraphelidium tribonemae* supports  
703 the phagotrophic origin of fungi. *Commun. Biol.* **1**, 1–11 (2018).
- 704 14. Ustinova, I., Krienitz, L. & Huss, V. A. R. *Hyaloraphidium curvatum* is not a green alga but a lower  
705 fungus; *Amoebidium parasiticum* is not a fungus, but a member of the DRIPs. *Protist* (2000)  
706 doi:10.1078/1434-4610-00023.
- 707 15. Powell, M. J. Looking at mycology with a Janus face: a glimpse at Chytridiomycetes active in the  
708 environment. *Mycologia* (1993) doi:10.2307/3760471.
- 709 16. Freeman, K. R. *et al.* Evidence that chytrids dominate fungal communities in high-elevation soils.  
710 *Proc. Natl. Acad. Sci. U. S. A.* (2009) doi:10.1073/pnas.0907303106.
- 711 17. Kagami, M., Miki, T. & Takimoto, G. Mycoloop: Chytrids in aquatic food webs. *Front. Microbiol.*  
712 (2014) doi:10.3389/fmicb.2014.00166.
- 713 18. Frenken, T. *et al.* Warming accelerates termination of a phytoplankton spring bloom by fungal  
714 parasites. *Glob. Chang. Biol.* (2016) doi:10.1111/gcb.13095.
- 715 19. Frenken, T. *et al.* Integrating chytrid fungal parasites into plankton ecology: research gaps and  
716 needs. *Environmental Microbiology* (2017) doi:10.1111/1462-2920.13827.
- 717 20. Tedersoo, L., Bahram, M., Puusepp, R., Nilsson, R. H. & James, T. Y. Novel soil-inhabiting clades



- 718 fill gaps in the fungal tree of life. *Microbiome* (2017) doi:10.1186/s40168-017-0259-5.
- 719 21. James, T. Y. *et al.* A molecular phylogeny of the flagellated fungi (Chytridiomycota) and description  
720 of a new phylum (Blastocladiomycota). *Mycologia* **98**, 860–871 (2006).
- 721 22. Chang, Y. *et al.* Phylogenomic analyses indicate that early fungi evolved digesting cell walls of  
722 algal ancestors of land plants. *Genome Biol. Evol.* **7**, 1590–1601 (2015).
- 723 23. Liu, Y. J., Hodson, M. C. & Hall, B. D. Loss of the flagellum happened only once in the fungal  
724 lineage: Phylogenetic structure of Kingdom Fungi inferred from RNA polymerase II subunit genes.  
725 *BMC Evol. Biol.* **6**, 1–13 (2006).
- 726 24. Bidartondo, M. I. *et al.* The dawn of symbiosis between plants and fungi. *Biol. Lett.* (2011)  
727 doi:10.1098/rsbl.2010.1203.
- 728 25. Lutzoni, F. *et al.* Contemporaneous radiations of fungi and plants linked to symbiosis. *Nat. Commun.*  
729 **9**, 1–11 (2018).
- 730 26. Sekimoto, S., Rochon, D., Long, J. E., Dee, J. M. & Berbee, M. L. A multigene phylogeny of  
731 *Olpidium* and its implications for early fungal evolution. *BMC Evol. Biol.* **11**, 331 (2011).
- 732 27. Spatafora, J. W. *et al.* A phylum-level phylogenetic classification of zygomycete fungi based on  
733 genome-scale data. *Mycologia* **108**, 1028–1046 (2016).
- 734 28. Taylor, J. W. & Berbee, M. L. Dating divergences in the Fungal Tree of Life: Review and new  
735 analyses. *Mycologia* (2006) doi:10.3852/mycologia.98.6.838.
- 736 29. Loron, C. C. *et al.* Early fungi from the Proterozoic era in Arctic Canada. *Nature* (2019)  
737 doi:10.1038/s41586-019-1217-0.
- 738 30. Ebersberger, I. *et al.* A consistent phylogenetic backbone for the fungi. *Mol. Biol. Evol.* **29**, 1319–  
739 1334 (2012).
- 740 31. James, T. Y. *et al.* Reconstructing the early evolution of Fungi using a six-gene phylogeny. *Nature*  
741 **443**, 818–822 (2006).
- 742 32. Barr, D. J. S. An outline for the reclassification of the Chytridiales, and for a new order, the  
743 Spizellomycetales. *Can. J. Bot.* **58**, 2380–2394 (1980).
- 744 33. Powell, M. J. & Letcher, P. M. Chytridiomycota, Monoblepharidomycota, and  
745 Neocallimastigomycota. in *Systematics and Evolution: Part A: Second Edition* (2014).  
746 doi:10.1007/978-3-642-55318-9.
- 747 34. Tedersoo, L. *et al.* High-level classification of the Fungi and a tool for evolutionary ecological  
748 analyses. *Fungal Divers.* **90**, 135–159 (2018).
- 749 35. Karpov, S. A. *et al.* The Chytrid-like Parasites of algae *Amoeboradix gromovi* gen. et sp. nov. and  
750 *Sanchytrium tribonematis* belong to a new fungal lineage. *Protist* **169**, 122–140 (2018).
- 751 36. Karpov, S. A., Vishnyakov, A. E., Moreira, D. & López-García, P. The ultrastructure of *Sanchytrium*

- 752 *tribonematis* (Sanchytriaceae, Fungi incertae sedis) confirms its close relationship to *Amoeboradix*.  
753 *J. Eukaryot. Microbiol.* 0–2 (2019) doi:10.1111/jeu.12740.
- 754 37. McCarthy, C. G. P. & Fitzpatrick, D. A. *Multiple Approaches to Phylogenomic Reconstruction of*  
755 *the Fungal Kingdom. Advances in Genetics* vol. 100 (Elsevier Inc., 2017).
- 756 38. Ahrendt, S. R. *et al.* Leveraging single-cell genomics to expand the fungal tree of life. *Nat.*  
757 *Microbiol.* **3**, 1417–1428 (2018).
- 758 39. Li, Y. *et al.* A genome-scale phylogeny of Fungi; insights into early evolution, radiations, and the  
759 relationship between taxonomy and phylogeny. *bioRxiv* (2020) doi:10.1101/2020.08.23.262857.
- 760 40. Simão, F. A., Waterhouse, R. M., Ioannidis, P., Kriventseva, E. V. & Zdobnov, E. M. BUSCO:  
761 Assessing genome assembly and annotation completeness with single-copy orthologs.  
762 *Bioinformatics* **31**, 3210–3212 (2015).
- 763 41. Billon-Grand, G., Fiol, J. B., Breton, A., Bruyère, A. & Oulhaj, Z. DNA of some anaerobic rumen  
764 fungi: G + C content determination. *FEMS Microbiol. Lett.* (1991) doi:10.1111/j.1574-  
765 6968.1991.tb04893.x.
- 766 42. Youssef, N. H. *et al.* The genome of the anaerobic fungus *Orpinomyces* sp. strain c1a reveals the  
767 unique evolutionary history of a remarkable plant biomass degrader. *Appl. Environ. Microbiol.*  
768 (2013) doi:10.1128/AEM.00821-13.
- 769 43. Videvall, E. *Plasmodium* parasites of birds have the most AT-rich genes of eukaryotes. *Microb.*  
770 *genomics* **4**, (2018).
- 771 44. Chen, Y. ping *et al.* Genome sequencing and comparative genomics of honey bee microsporidia,  
772 *Nosema apis* reveal novel insights into host-parasite interactions. *BMC Genomics* (2013)  
773 doi:10.1186/1471-2164-14-451.
- 774 45. Karpov, S. A. *et al.* Monoblepharidomycetes diversity includes new parasitic and saprotrophic  
775 species with highly intronized rDNA. *Fungal Biol.* **121**, 729–741 (2017).
- 776 46. Thomarat, F., Vivarès, C. P. & Gouy, M. Phylogenetic analysis of the complete genome sequence  
777 of *Encephalitozoon cuniculi* supports the fungal origin of microsporidia and reveals a high  
778 frequency of fast-evolving genes. *J. Mol. Evol.* **59**, 780–791 (2004).
- 779 47. Mikhailov, K. V, Simdyanov, T. G., Aleoshin, V. V & Belozersky, A. N. Genomic survey of a  
780 hyperparasitic microsporidian *Amphiamblys* sp. (Metchnikovellidae) *Genome Biology and*  
781 *Evolution* (2016) doi:10.1093/gbe/evw235.
- 782 48. Galindo, L. J. *et al.* Evolutionary genomics of *Metchnikovella incurvata* (metchnikovellidae): An  
783 early branching microsporidium. *Genome Biol. Evol.* **10**, 2736–2748 (2018).
- 784 49. Aguilera, G. *et al.* High variability of mitochondrial gene order among fungi. *Genome Biol. Evol.*  
785 (2014) doi:10.1093/gbe/evu028.

- 786 50. Mikhailov, K. V., Simdyanov, T. G. & Aleoshin, V. V. Genomic survey of a hyperparasitic  
787 microsporidian *Amphiamblys* sp. (Metchnikovellidae). *Genome Biol. Evol.* (2017)  
788 doi:10.1093/gbe/evw235.
- 789 51. Galindo, L. J. *et al.* Combined cultivation and single-cell approaches to the phylogenomics of  
790 nucleariid amoebae, close relatives of fungi. *Philos. Trans. R. Soc. B Biol. Sci.* **374**, 20190094  
791 (2019).
- 792 52. Lartillot, N. & Philippe, H. A Bayesian mixture model for across-site heterogeneities in the amino-  
793 acid replacement process. *Mol. Biol. Evol.* **21**, 1095–1109 (2004).
- 794 53. Wang, H. C., Minh, B. Q., Susko, E. & Roger, A. J. Modeling site heterogeneity with posterior mean  
795 site frequency profiles accelerates accurate phylogenomic estimation. *Syst. Biol.* (2018)  
796 doi:10.1093/sysbio/syx068.
- 797 54. Hoffman, Y. *et al.* Isolation and characterization of a novel chytrid species (phylum  
798 Blastocladiomycota), parasitic on the green alga *Haematococcus*. *Mycol. Res.* (2008)  
799 doi:10.1016/j.mycres.2007.09.002.
- 800 55. Gutman, J., Zarka, A. & Boussiba, S. The host-range of *Paraphysoderma sedebokerensis*, a chytrid  
801 that infects *Haematococcus pluvialis*. *Eur. J. Phycol.* (2009) doi:10.1080/09670260903161024.
- 802 56. James, T. Y., Hoffman, Y., Zarka, A. & Boussiba, S. *Paraphysoderma sedebokerense*, gen. et sp.  
803 Nov., an aplanosporic relative of *Physoderma* (Blastocladiomycota). *Mycotaxon* (2011)  
804 doi:10.5248/118.177.
- 805 57. Couch, J. N. Validation of the family Coelomomycetaceae and certain species and varieties of  
806 *Coelomomyces*. *J. Elisha Mitchell Sci. Soc.* **78**, 135–138 (1962).
- 807 58. Uebelmesser, E. ruth. Über einige neue Chytridineen aus Erdboden - *Olpidium*, *Rhizophidium*,  
808 *Phlyctochytrium* und *Rhizophlyctis*. *Arch. Mikrobiol.* (1956) doi:10.1007/BF00424866.
- 809 59. Leipe, D. D., GUNDERSON, J. H., Nerad, T. A. & Sogin, M. L. Small subunit ribosomal rna of  
810 *Hexamita inflata* and the quest for the 1st branch in the eukaryotic tree. *Molecular Biochemical*  
811 *Parasitology* vol. 59 41–48 (1993).
- 812 60. Kamaishi, T. *et al.* Complete Nucleotide sequences of the genes encoding translation elongation  
813 factors 1 and 2 from a microsporidian parasite, *Glugea plecoglossi*: Implications for the deepest  
814 branching of eukaryotes. *J. Biochem.* **120**, 1095–1103 (1996).
- 815 61. Philippe, H. *et al.* Early-branching or fast-evolving eukaryotes? An answer based on slowly evolving  
816 positions. *Proc. R. Soc. B Biol. Sci.* **267**, 1213–1221 (2000).
- 817 62. Brinkmann, H. & Philippe, H. Archaea sister group of Bacteria? Indications from tree reconstruction  
818 artifacts in ancient phylogenies. *Mol. Biol. Evol.* (1999)  
819 doi:10.1093/oxfordjournals.molbev.a026166.

- 820 63. Susko, E. & Roger, A. J. On reduced amino acid alphabets for phylogenetic inference. *Mol. Biol.*  
821 *Evol.* (2007) doi:10.1093/molbev/msm144.
- 822 64. Olive, L. S. *Caulochytrium protostelioides* sp. nov., a new chytrid with aerial sporangia. *Am. J. Bot.*  
823 (1980) doi:10.2307/2442298.
- 824 65. Chang, Y. *et al.* Genome-scale phylogenetic analyses confirm *Olpidium* as the closest living  
825 zoosporic fungus to the non-flagellated, terrestrial fungi. *bioRxiv* (2020)  
826 doi:10.1101/2020.09.16.298935.
- 827 66. Naranjo-Ortiz, M. A. & Gabaldón, T. Fungal evolution: diversity, taxonomy and phylogeny of the  
828 Fungi. *Biol. Rev.* **94**, 2101–2137 (2019).
- 829 67. Field, K. J. *et al.* First evidence of mutualism between ancient plant lineages (Haplomitriopsida  
830 liverworts) and Mucoromycotina fungi and its response to simulated Palaeozoic changes in  
831 atmospheric CO<sub>2</sub>. *New Phytol.* (2015) doi:10.1111/nph.13024.
- 832 68. Feijen, F. A. A., Vos, R. A., Nuytinck, J. & Merckx, V. S. F. T. Evolutionary dynamics of  
833 mycorrhizal symbiosis in land plant diversification. *Sci. Rep.* (2018) doi:10.1038/s41598-018-  
834 28920-x.
- 835 69. Vargas, M. M., Aronson, J. M. & Roberson, R. W. The cytoplasmic organization of hyphal tip cells  
836 in the fungus *Allomyces macrogynus*. *Protoplasma* (1993) doi:10.1007/BF01378938.
- 837 70. Stajich, J. E. *et al.* The Fungi. *Current Biology* (2009) doi:10.1016/j.cub.2009.07.004.
- 838 71. Archibald, J. M., Simpson, A. G. B. & Slamovits, C. H. *Handbook of the Protists. Handbook of the*  
839 *Protists* (Springer International Publishing, 2017). doi:10.1007/978-3-319-32669-6.
- 840 72. Huerta-Cepas, J. *et al.* Fast genome-wide functional annotation through orthology assignment by  
841 eggNOG-mapper. *Mol. Biol. Evol.* **34**, 2115–2122 (2017).
- 842 73. Cuomo, C. A. *et al.* Microsporidian genome analysis reveals evolutionary strategies for obligate  
843 intracellular growth. *Genome Res.* (2012) doi:10.1101/gr.142802.112.
- 844 74. Nakjang, S. *et al.* Reduction and expansion in microsporidian genome evolution: New insights from  
845 comparative genomics. *Genome Biol. Evol.* (2013) doi:10.1093/gbe/evt184.
- 846 75. Vivarès, C. P., Gouy, M., Thomarat, F. & Méténier, G. Functional and evolutionary analysis of a  
847 eukaryotic parasitic genome. *Current Opinion in Microbiology* (2002) doi:10.1016/S1369-  
848 5274(02)00356-9.
- 849 76. Corsaro, D. *et al.* Microsporidia-like parasites of amoebae belong to the early fungal lineage  
850 Rozellomycota. *Parasitol. Res.* **113**, 1909–1918 (2014).
- 851 77. Ho, Y. W. & Barr, D. J. S. Classification of anaerobic gut fungi from herbivores with emphasis on  
852 rumen fungi from Malaysia. *Mycologia* (1995) doi:10.2307/3760810.
- 853 78. Powell, M. J. Chytridiomycota. in *Handbook of the Protists: Second Edition* (2017).

- 854 doi:10.1007/978-3-319-28149-0\_18.
- 855 79. Ogata, H. *et al.* KEGG: Kyoto encyclopedia of genes and genomes. *Nucleic Acids Research* (1999)
- 856 doi:10.1093/nar/27.1.29.
- 857 80. Gissi, C., Iannelli, F. & Pesole, G. Evolution of the mitochondrial genome of Metazoa as
- 858 exemplified by comparison of congeneric species. *Heredity* (2008) doi:10.1038/hdy.2008.62.
- 859 81. Egger, B., Bachmann, L. & Fromm, B. Atp8 is in the ground pattern of flatworm mitochondrial
- 860 genomes. *BMC Genomics* (2017) doi:10.1186/s12864-017-3807-2.
- 861 82. Agrawal, Y., Khatri, I., Subramanian, S. & Shenoy, B. D. Genome sequence, comparative analysis,
- 862 and evolutionary insights into chitinases of entomopathogenic fungus *Hirsutella thompsonii*.
- 863 *Genome Biol. Evol.* (2015) doi:10.1093/gbe/evv037.
- 864 83. de Oliveira, E. S. *et al.* Molecular evolution and transcriptional profile of GH3 and GH20  $\beta$ -n-
- 865 acetylglucosaminidases in the entomopathogenic fungus *Metarhizium anisopliae*. *Genet. Mol. Biol.*
- 866 (2018) doi:10.1590/1678-4685-gmb-2017-0363.
- 867 84. Cavalier-Smith, T. & Chao, E. E. Y. Phylogeny of choanozoa, apusozoa, and other protozoa and
- 868 early eukaryote megaevolution. *J. Mol. Evol.* (2003) doi:10.1007/s00239-002-2424-z.
- 869 85. Torruella, G. *et al.* Phylogenomics reveals convergent evolution of lifestyles in close relatives of
- 870 animals and fungi. *Curr. Biol.* **25**, 2404–2410 (2015).
- 871 86. Naranjo-Ortiz, M. A. & Gabaldón, T. Fungal evolution: major ecological adaptations and
- 872 evolutionary transitions. *Biol. Rev.* **94**, 1443–1476 (2019).
- 873 87. Letcher, P. M. & Powell, M. J. A taxonomic summary and revision of *Rozella* (Cryptomycota). *IMA*
- 874 *Fungus* **9**, 383–399 (2018).
- 875 88. Hibbett, D. S. *et al.* A higher-level phylogenetic classification of the Fungi. *Mycol. Res.* (2007)
- 876 doi:10.1016/j.mycres.2007.03.004.
- 877 89. Mitchell, D. R. Speculations on the evolution of 9+2 organelles and the role of central pair
- 878 microtubules. *Biology of the Cell* (2004) doi:10.1016/j.biolcel.2004.07.004.
- 879 90. Letcher, P. M. *et al.* An ultrastructural study of *Paraphysoderma sedebokerense*
- 880 (Blastocladiomycota), an epibiotic parasite of microalgae. *Fungal Biol.* **120**, 324–337 (2016).
- 881 91. Strittmatter, M., Guerra, T., Silva, J. & Gachon, C. M. M. A new flagellated dispersion stage in
- 882 *Paraphysoderma sedebokerense*, a pathogen of *Haematococcus pluvialis*. *J. Appl. Phycol.* **28**,
- 883 1553–1558 (2016).
- 884 92. Sparrow, F. K. Aquatic Phycomycetes. *Univ. Michigan Press* **132**, (1960).
- 885 93. Powell, M. J. Blastocladiomycota. in *Handbook of the Protists: Second Edition* (2017).
- 886 doi:10.1007/978-3-319-28149-0\_17.
- 887 94. Aubusson-Fleury, A. *et al.* Centrin diversity and basal body patterning across evolution: New

- 888 insights from *Paramecium*. *Biol. Open* **6**, 765–776 (2017).
- 889 95. Dupuis-Williams, P. *et al.* Functional role of  $\epsilon$ -tubulin in the assembly of the centriolar microtubule  
890 scaffold. *J. Cell Biol.* **158**, 1183–1193 (2002).
- 891 96. Forget, L., Ustinova, J., Wang, Z., Huss, V. A. R. & Lang, B. F. *Hyaloraphidium curvatum*: A linear  
892 mitochondrial genome, tRNA editing, and an evolutionary link to lower fungi. *Mol. Biol. Evol.*  
893 (2002) doi:10.1093/oxfordjournals.molbev.a004084.
- 894 97. McKerracher, L. J. & Heath, I. B. The structure and cycle of the nucleus-associated organelle in two  
895 species of *Basidiobolus*. *Mycologia* (1985) doi:10.2307/3793197.
- 896 98. Roberson, R. W. *et al.* The hyphal tip structure of *Basidiobolus* sp.: A zygomycete fungus of  
897 uncertain phylogeny. *Fungal Biol.* (2011) doi:10.1016/j.funbio.2011.02.012.
- 898 99. McLaughlin, D. J., Healy, R. A., Celio, G. J., Roberson, R. W. & Kumar, T. K. A. Evolution of  
899 zygomycetous spindle pole bodies: Evidence from *Coemansia reversa* mitosis. *Am. J. Bot.* (2015)  
900 doi:10.3732/ajb.1400477.
- 901 100. Fabel, P., Radek, R. & Storch, V. A new spore-forming protist, *Nephridiophaga blaberi* sp. nov., in  
902 the Death's head cockroach *Blaberus craniifer*. *Eur. J. Protistol.* (2000) doi:10.1016/S0932-  
903 4739(00)80044-9.
- 904 101. Radek, R. *et al.* Morphologic and molecular data help adopting the insect-pathogenic  
905 nephridiophagids (Nephridiophagidae) among the early diverging fungal lineages, close to the  
906 Chytridiomycota. *MycoKeys* (2017) doi:10.3897/mycokeys.25.12446.
- 907 102. Strassert, J. F. H. *et al.* Long rDNA amplicon sequencing of insect-infecting nephridiophagids  
908 reveals their affiliation to the Chytridiomycota (Fungi) and a potential to switch between hosts.  
909 *bioRxiv* (2020) doi:10.1101/2020.10.14.339143.
- 910 103. Belas, R., Simon, M. & Silverman, M. Regulation of lateral flagella gene transcription in *Vibrio*  
911 *parahaemolyticus*. *J. Bacteriol.* **167**, 210–218 (1986).
- 912 104. Belas, R. Biofilms, flagella, and mechanosensing of surfaces by bacteria. *Trends Microbiol.* **22**,  
913 517–527 (2014).
- 914 105. Wang, Q., Suzuki, A., Mariconda, S., Porwollik, S. & Harshey, R. M. Sensing wetness: A new role  
915 for the bacterial flagellum. *EMBO J.* **24**, 2034–2042 (2005).
- 916 106. Lovett, J. S. Growth and differentiation of the water mold *Blastocladiella emersonii*:  
917 cytodifferentiation and the role of ribonucleic acid and protein synthesis. *Bacteriol. Rev.* **39**, 345–  
918 404 (1975).
- 919 107. Avelar, G. M. *et al.* A Rhodopsin-Guanylyl cyclase gene fusion functions in visual perception in a  
920 fungus. *Curr. Biol.* **24**, 1234–1240 (2014).
- 921 108. Avelar, G. M. *et al.* A cyclic GMP-dependent K<sup>+</sup> channel in the blastocladiomycete fungus

- 922 *Blastocladia emersonii*. *Eukaryot. Cell* **14**, 958–963 (2015).
- 923 109. Richards, T. A. & Gomes, S. L. How to build a microbial eye. *Nature* **523**, 166–167 (2015).
- 924 110. Ernst, O. P. *et al.* Microbial and animal rhodopsins: Structures, functions, and molecular  
925 mechanisms. *Chemical Reviews* (2014) doi:10.1021/cr4003769.
- 926 111. Needham, D. M. *et al.* A distinct lineage of giant viruses brings a rhodopsin photosystem to  
927 unicellular marine predators. *Proc. Natl. Acad. Sci. U. S. A.* (2019) doi:10.1073/pnas.1907517116.
- 928 112. Wöstemeyer, J., Grünler, A., Schimek, C. & Voigt, K. Genetic regulation of carotenoid biosynthesis  
929 in fungi. in *Applied Mycology and Biotechnology* (2005). doi:10.1016/S1874-5334(05)80013-9.
- 930 113. Nagy, L. G., Kovács, G. M. & Krizsán, K. Complex multicellularity in fungi: evolutionary  
931 convergence, single origin, or both? *Biol. Rev.* **93**, 1778–1794 (2018).
- 932 114. Kiss, E. *et al.* Comparative genomics reveals the origin of fungal hyphae and multicellularity. *Nat.*  
933 *Commun.* **10**, (2019).
- 934 115. Andrews, S. FastQC: A quality control tool for high throughput sequence data.  
935 [Http://Www.Bioinformatics.Babraham.Ac.Uk/Projects/Fastqc/](http://www.Bioinformatics.Babraham.Ac.Uk/Projects/Fastqc/)  
936 <http://www.bioinformatics.babraham.ac.uk/projects/> (2010) doi:citeulike-article-id:11583827.
- 937 116. Bolger, A. M., Lohse, M. & Usadel, B. Trimmomatic: A flexible trimmer for Illumina sequence  
938 data. *Bioinformatics* **30**, 2114–2120 (2014).
- 939 117. Bankevich, A. *et al.* SPAdes: A new genome assembly algorithm and Its applications to single-cell  
940 sequencing. *J. Comput. Biol.* **19**, 455–477 (2012).
- 941 118. Laetsch, D. R. & Blaxter, M. L. BlobTools: Interrogation of genome assemblies. *F1000Research* **6**,  
942 1287 (2017).
- 943 119. Li, W. & Godzik, A. Cd-hit: A fast program for clustering and comparing large sets of protein or  
944 nucleotide sequences. *Bioinformatics* (2006) doi:10.1093/bioinformatics/btl158.
- 945 120. Camacho, C. *et al.* BLAST+: Architecture and applications. *BMC Bioinformatics* (2009)  
946 doi:10.1186/1471-2105-10-421.
- 947 121. Gurevich, A., Saveliev, V., Vyahhi, N. & Tesler, G. QUAST: Quality assessment tool for genome  
948 assemblies. *Bioinformatics* **29**, 1072–1075 (2013).
- 949 122. Okonechnikov, K., Conesa, A. & García-Alcalde, F. Qualimap 2: Advanced multi-sample quality  
950 control for high-throughput sequencing data. *Bioinformatics* **32**, 292–294 (2015).
- 951 123. Altschul, S. F., Gish, W., Miller, W., Myers, E. W. & Lipman, D. J. Basic local alignment search  
952 tool. *J. Mol. Biol.* **215**, 403–410 (1990).
- 953 124. Bernt, M. *et al.* MITOS: Improved de novo metazoan mitochondrial genome annotation. *Mol.*  
954 *Phylogenet. Evol.* (2013) doi:10.1016/j.ympev.2012.08.023.
- 955 125. Katoh, K. & Standley, D. M. MAFFT multiple sequence alignment software version 7:

- 956 Improvements in performance and usability. *Mol. Biol. Evol.* **30**, 772–780 (2013).
- 957 126. Capella-Gutiérrez, S., Silla-Martínez, J. M. & Gabaldón, T. trimAl: A tool for automated alignment  
958 trimming in large-scale phylogenetic analyses. *Bioinformatics* **25**, 1972–1973 (2009).
- 959 127. Kearse, M. *et al.* Geneious Basic: An integrated and extendable desktop software platform for the  
960 organization and analysis of sequence data. *Bioinformatics* **28**, 1647–1649 (2012).
- 961 128. Price, M. N., Dehal, P. S. & Arkin, A. P. Fasttree: Computing large minimum evolution trees with  
962 profiles instead of a distance matrix. *Mol. Biol. Evol.* (2009) doi:10.1093/molbev/msp077.
- 963 129. Lartillot, N., Lepage, T. & Blanquart, S. PhyloBayes 3: A Bayesian software package for  
964 phylogenetic reconstruction and molecular dating. *Bioinformatics* (2009)  
965 doi:10.1093/bioinformatics/btp368.
- 966 130. Nguyen, L. T., Schmidt, H. A., Von Haeseler, A. & Minh, B. Q. IQ-TREE: A fast and effective  
967 stochastic algorithm for estimating maximum-likelihood phylogenies. *Mol. Biol. Evol.* **32**, 268–274  
968 (2015).
- 969 131. Minh, B. Q., Nguyen, M. A. T. & Von Haeseler, A. Ultrafast approximation for phylogenetic  
970 bootstrap. *Mol. Biol. Evol.* (2013) doi:10.1093/molbev/mst024.
- 971 132. Anisimova, M., Gil, M., Dufayard, J. F., Dessimoz, C. & Gascuel, O. Survey of branch support  
972 methods demonstrates accuracy, power, and robustness of fast likelihood-based approximation  
973 schemes. *Syst. Biol.* (2011) doi:10.1093/sysbio/syr041.
- 974 133. Rambaut, A. FigTree v1.4.3. *Molecular evolution, phylogenetics and epidemiology* (2016).
- 975 134. Mesquite Project Team. Mesquite: A modular system for evolutionary analysis. Available from:  
976 <http://mesquiteproject.wikispaces.com/home> (2014) doi:10.1017/CBO9781107415324.004.
- 977 135. Felsenstein, J. PHYLIP (Phylogenetic Inference Package, version 3.5c). *Department of Genetics,*  
978 *SK, University of Washington, Seattle, WA* (1993) doi:10.2987/10-6090.1.
- 979 136. R Development Core Team, R. *R: A Language and Environment for Statistical Computing.* R  
980 *Foundation for Statistical Computing* (2011). doi:10.1007/978-3-540-74686-7.
- 981 137. Kanehisa, M., Sato, Y. & Morishima, K. BlastKOALA and GhostKOALA: KEGG tools for  
982 functional characterization of genome and metagenome sequences. *J. Mol. Biol.* (2016)  
983 doi:10.1016/j.jmb.2015.11.006.
- 984 138. Carvalho-Santos, Z., Azimzadeh, J., Pereira-Leal, J. B. & Bettencourt-Dias, M. Tracing the origins  
985 of centrioles, cilia, and flagella. *Journal of Cell Biology* (2011) doi:10.1083/jcb.201011152.
- 986 139. Wickstead, B. & Gull, K. Evolutionary biology of dyneins. in *Dyneins* (2012). doi:10.1016/B978-  
987 0-12-382004-4.10002-0.
- 988 140. Van Dam, T. J. P. *et al.* Evolution of modular intraflagellar transport from a coatomer-like  
989 progenitor. *Proc. Natl. Acad. Sci. U. S. A.* **110**, 6943–6948 (2013).



- 990 141. Kubicek, C. P., Starr, T. L. & Glass, N. L. Plant cell wall – degrading enzymes and their secretion  
991 in plant-pathogenic fungi. (2014) doi:10.1146/annurev-phyto-102313-045831.
- 992 142. Sista Kameshwar, A. K. & Qin, W. Systematic review of publicly available non-Dikarya fungal  
993 proteomes for understanding their plant biomass-degrading and bioremediation potentials.  
994 *Bioresources and Bioprocessing* (2019) doi:10.1186/s40643-019-0264-6.
- 995 143. Csurös, M. Count: Evolutionary analysis of phylogenetic profiles with parsimony and likelihood.  
996 *Bioinformatics* **26**, 1910–1912 (2010).
- 997
- 998
- 999

1000 **Table 1.** Comparative statistics of sanchytrid genomes before and after decontamination with  
 1001 related zoosporic lineages.

|                    | <i>Amoeboradix gromovi</i> |        | <i>Sanchytrium tribonematis</i> |        | <i>Allomyces macrogynus</i> | <i>Catenaria anguillulae</i> | <i>R. globosum</i> | <i>S. punctatus</i> | <i>A. robustus</i> |
|--------------------|----------------------------|--------|---------------------------------|--------|-----------------------------|------------------------------|--------------------|---------------------|--------------------|
|                    | Before                     | After  | Before                          | After  |                             |                              |                    |                     |                    |
| Genome size (Mb)   | 48.7                       | 10.5   | 37.1                            | 11.2   | 52.62                       | 41.34                        | 57.02              | 24.1                | 71.69              |
| GC%                | 51.06                      | 36.27  | 42.9                            | 34.64  | 61.6                        | 56                           | 44.9               | 47.6                | 16.3               |
| Number of contigs  | 8,420                      | 1,167  | 8,015                           | 1,960  | 8,973                       | 509                          | 437                | 329                 | 1,035              |
| N50                | 27,236                     | 13,376 | 17,350                          | 11,874 | 35,497                      | 217,825                      | 292,246            | 155,888             | 141,798            |
| Predicted proteins | 87,868                     | 7,220  | 50,780                          | 9,368  | 19,447                      | 12,763                       | 16,987             | 9,422               | 12,083             |

1002

1003

1004 **Fig. 1. Phylogenomic analysis of Holomycota.** **a**, Bayesian inference (BI) phylogenomic tree  
1005 based on 264 conserved proteins. The tree was reconstructed using 69 species and 91,768 amino  
1006 acid positions with the CAT-Poisson model and the LG+R9+PMSF model for maximum  
1007 likelihood (ML). Branches with support values higher or equal to 0.99 BI posterior probability and  
1008 99% ML bootstrap are indicated by black dots. **b**, Evolution of IQ-TREE ML bootstrap support  
1009 for Chytridiomycota sister of all other fungi (C+F), Blastocladiomycota + Sanchytriomycota sister  
1010 of all other fungi (B+F), *Olpidium* independent lineage sister to non-flagellated fungi (O+ZMD),  
1011 *Olpidium* within Zoopagomycota (O+Z), Sanchytriomycota within Blastocladiomycota (S+B),  
1012 and the monophyly of Dikarya (Dikarya) as a function of the proportion of fast-evolving sites  
1013 removed from two datasets (GBE69 without long-branching Microsporidia, and GBE84 with long-  
1014 branching Microsporidia). The canonical Fungi clade is indicated next to the node. Holomycota  
1015 are highlighted in violet, sanchytrids in pink and outgroup taxa in other colors. All phylogenomic  
1016 trees can be seen in Supplementary Figs. 2a-e.

1017  
1018 **Fig. 2. Distribution patterns of primary metabolism genes in Holomycota.** **a**, Binary heat-map  
1019 and **b**, principal coordinate analysis (PCoA) species clustering based on the presence/absence of  
1020 1158 orthologous genes belonging to 8 primary metabolism Gene Ontology categories across 43  
1021 eukaryotic genomes and transcriptomes. Species are color- and shaped-coded according to their  
1022 taxonomic affiliation. COG presence is depicted in blue and absence is depicted in white.

1023  
1024 **Fig. 3. Comparison of flagellar protein distribution and structure in sanchytrids and other**  
1025 **Holomycota.** **a**, Presence/absence heatmap of 61 flagellum-specific proteins in 48 eukaryotic  
1026 flagellated (purple) and non-flagellated (pink) lineages. The right column lists microtubular genes  
1027 and flagellum-specific genes. **b**, Illustration depicting the main structural elements present in a  
1028 typical eukaryotic flagellum (left) and a reduced sanchytrid flagellum (right). Gene presence is  
1029 depicted in blue and absence is depicted in white. **c**, Representation of the evolutionary  
1030 relationships of holomycotan lineages and their patterns of presence/absence of key molecular  
1031 components of the flagellar apparatus. Red crosses on branches indicate independent flagellum  
1032 losses.

1033

1034 **Fig. 4. Hyphae-related genes across Holomycota.** **a**, Cladogram of Holomycota depicting the  
1035 phylogenetic relationships according to the GBE69 phylogenomic reconstruction. Bubble size on  
1036 the nodes and tips represents the total number of reconstructed ancestral and extant hyphal  
1037 multicellularity-related proteins. CBOZ (Chytridiomycota, Blastocladiomycota, Olpidiomycota  
1038 and Zoopagomycota) and NRA (Nucleariids, Rozellida-Microsporidia and Aphelida) nodes are  
1039 indicated with letters within the corresponding bubbles. Unicellular lineages are highlighted in  
1040 colors according to their taxonomic affiliation (bottom to top: Amoebozoa, Apusomonadida,  
1041 nucleariids, Rozellida-Microsporidia, Aphelida, Chytridiomycota, Sanchytriomycota-  
1042 Blastocladiomycota, Olpidiomycota and Zoopagomycota). **b**, Presence/absence heatmap of 619  
1043 hyphal morphogenesis proteins in 69 unicellular (color-highlighted) and multicellular (not  
1044 highlighted) eukaryotic proteomes. Gene presence is depicted in blue and absence in white. **c**,  
1045 Heatmap clustered by similarity showing the correlation between unicellular (color-highlighted)  
1046 and multicellular (not highlighted) taxa according to the presence/absence of hyphal  
1047 morphogenesis gene proteins.

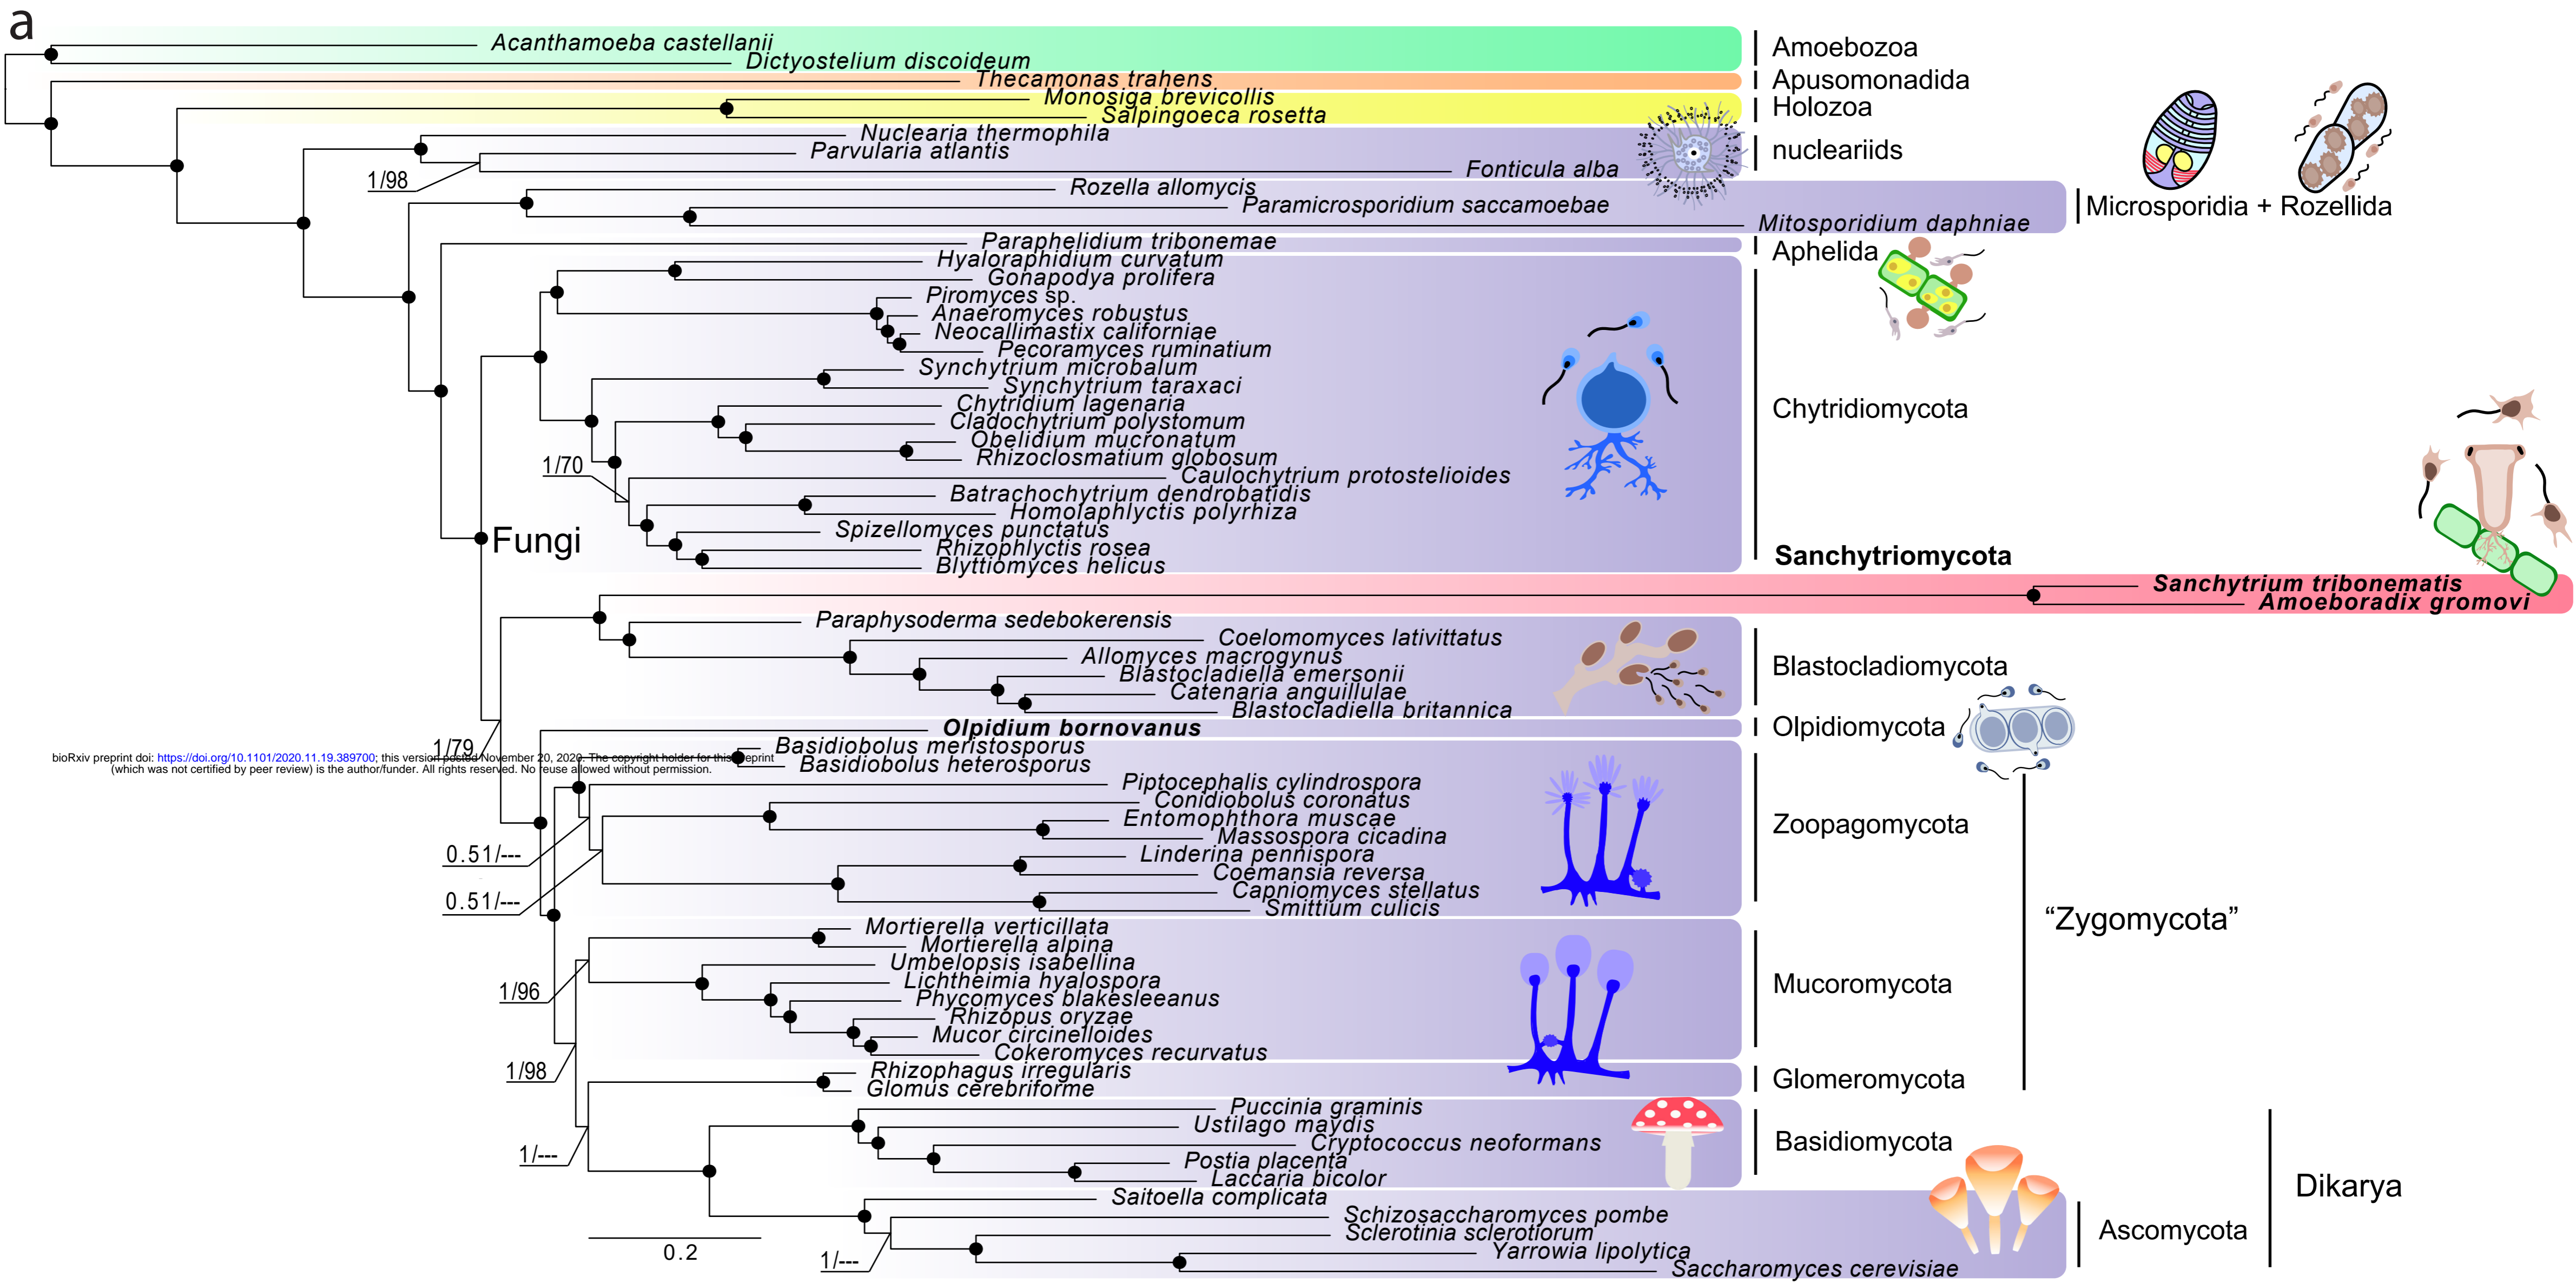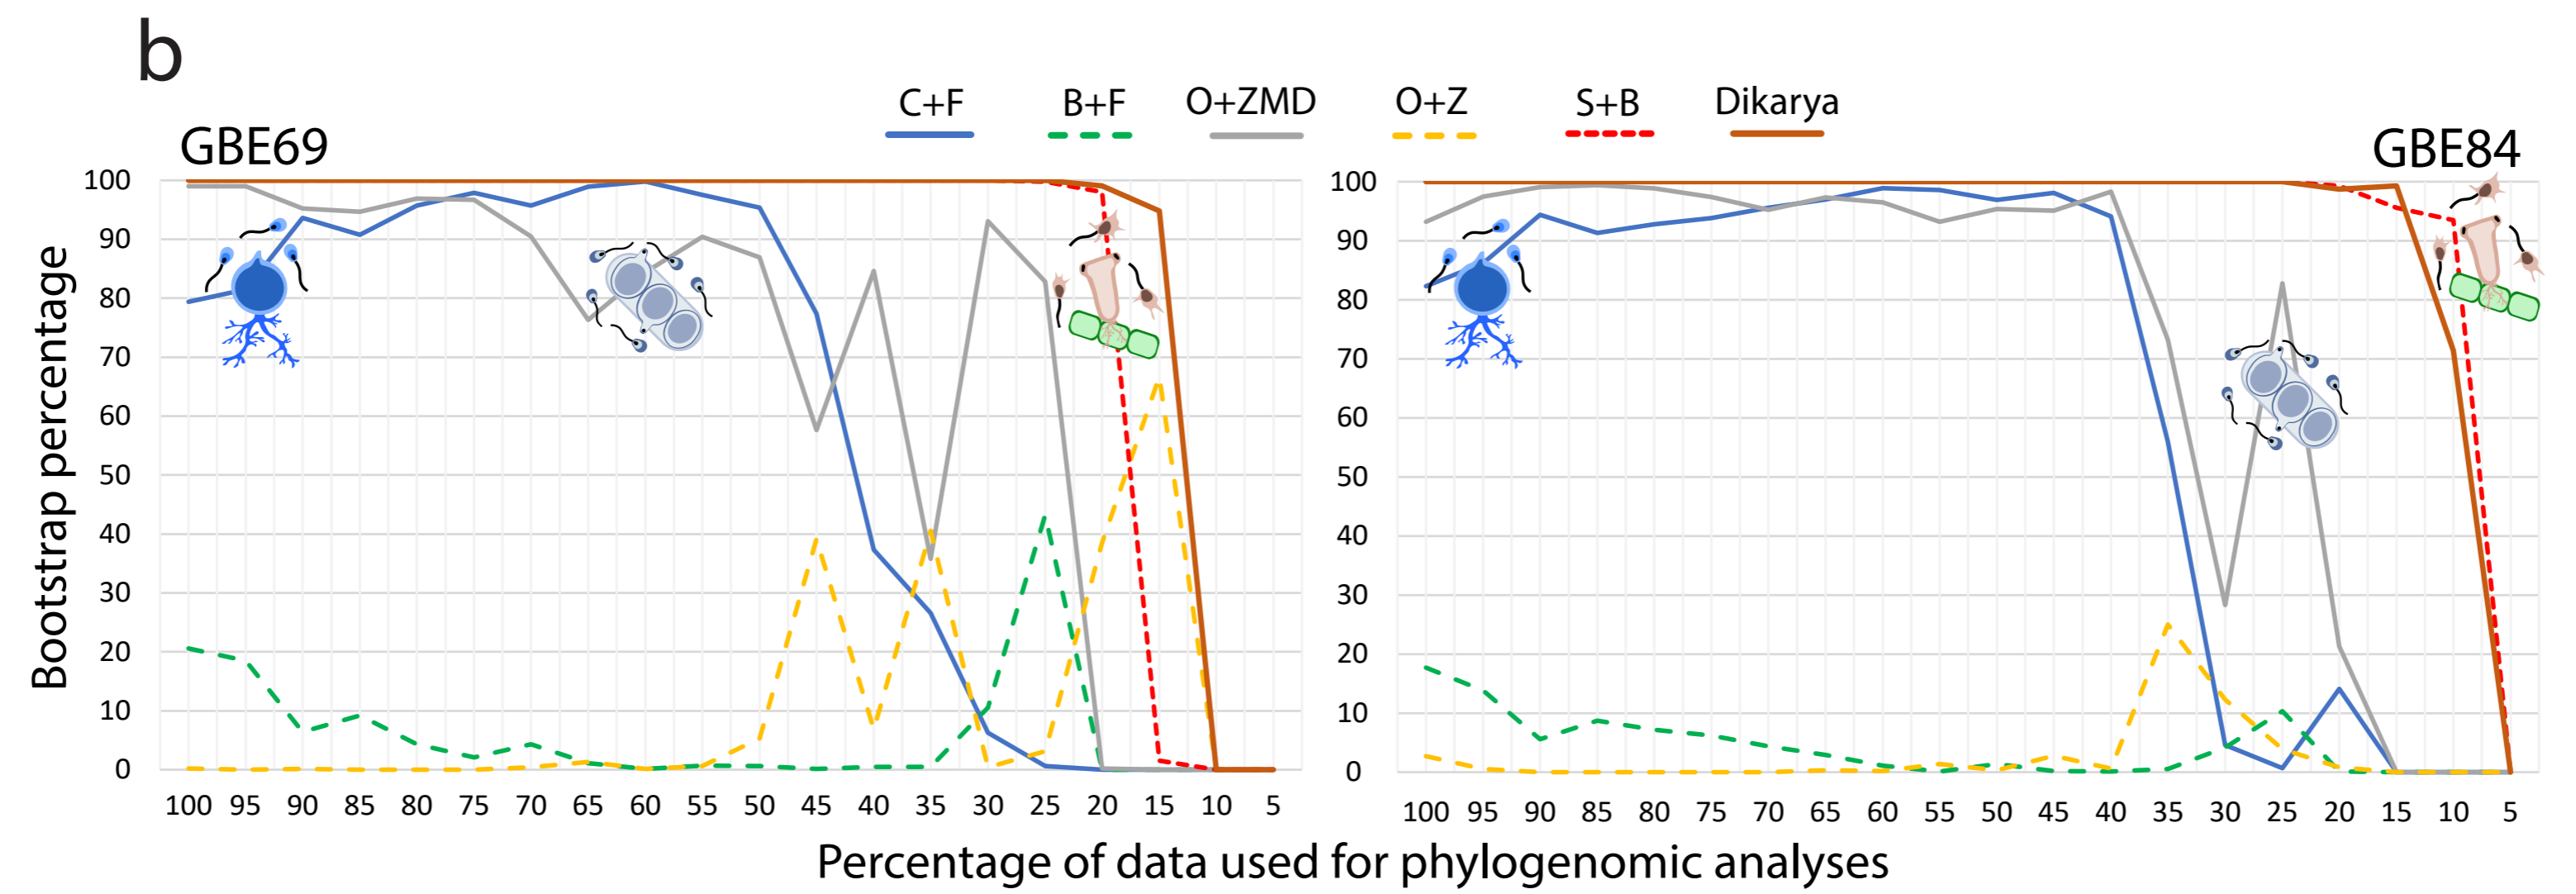

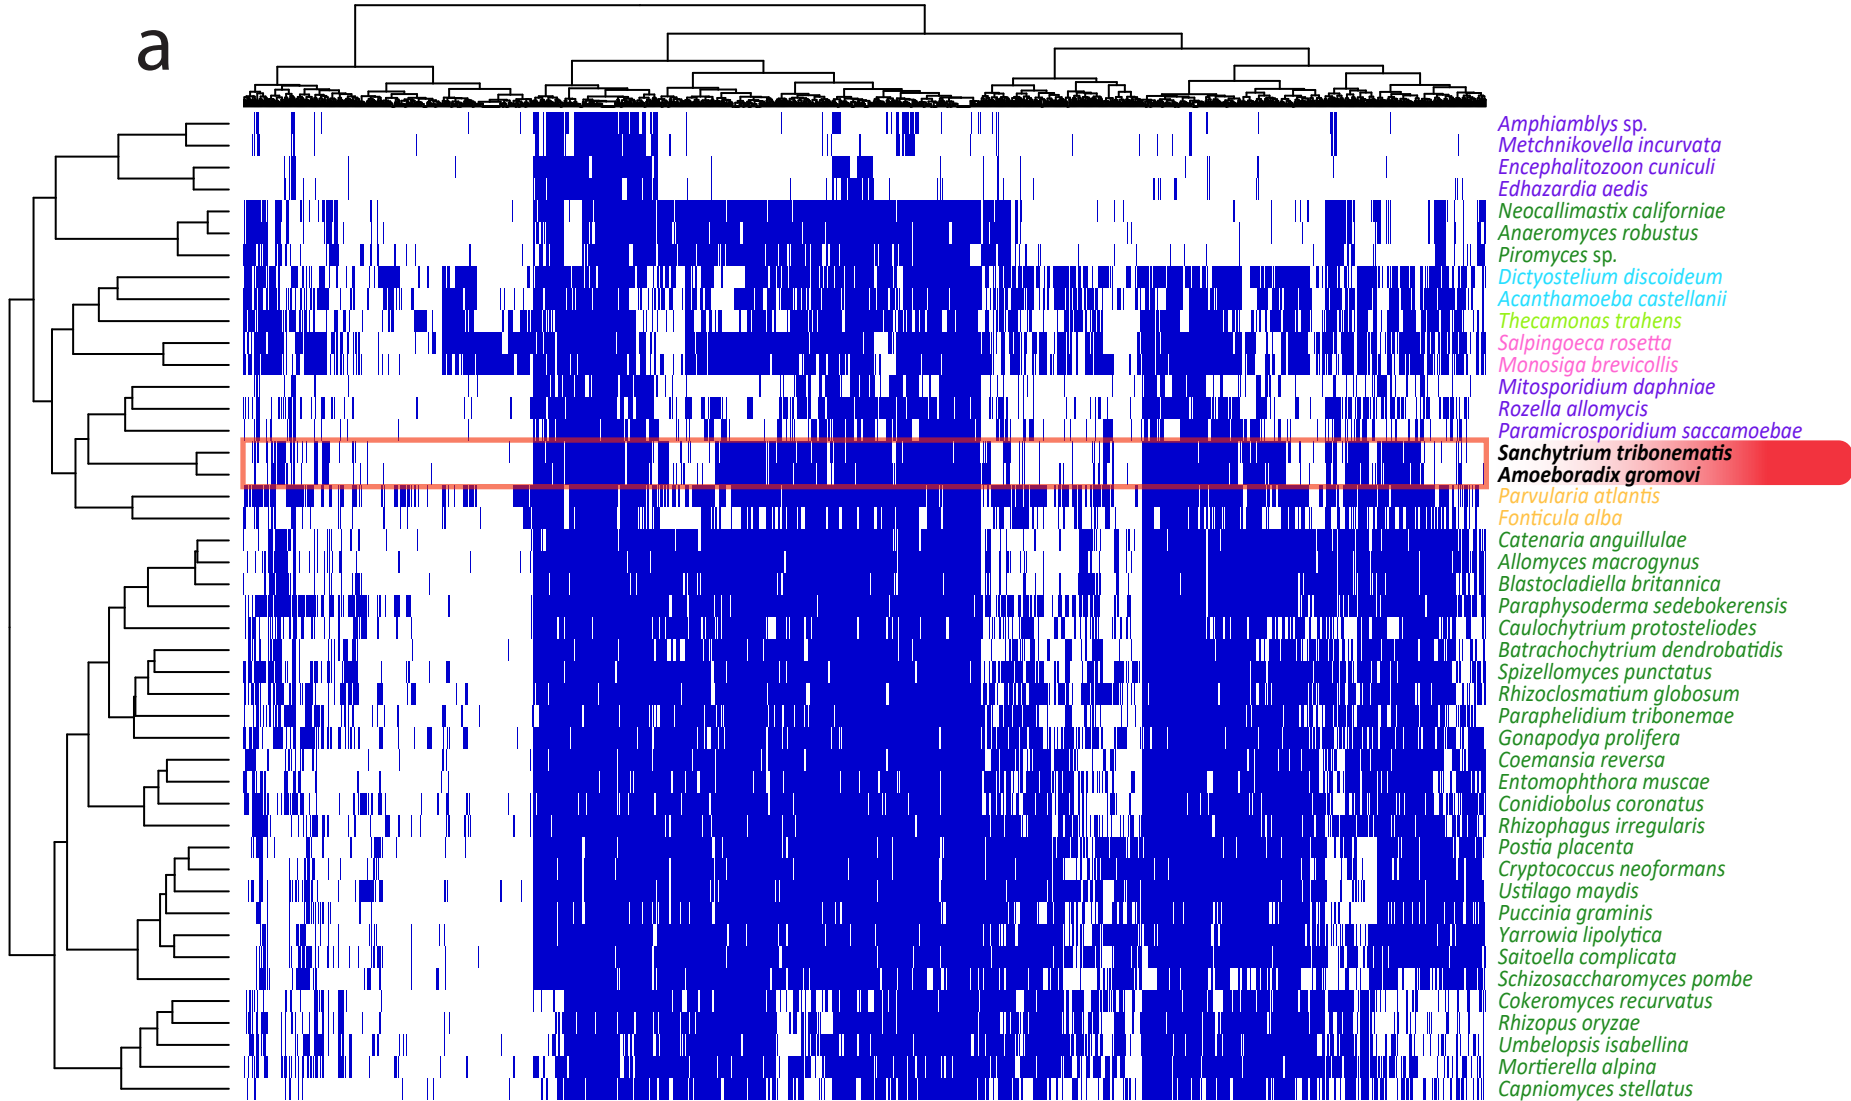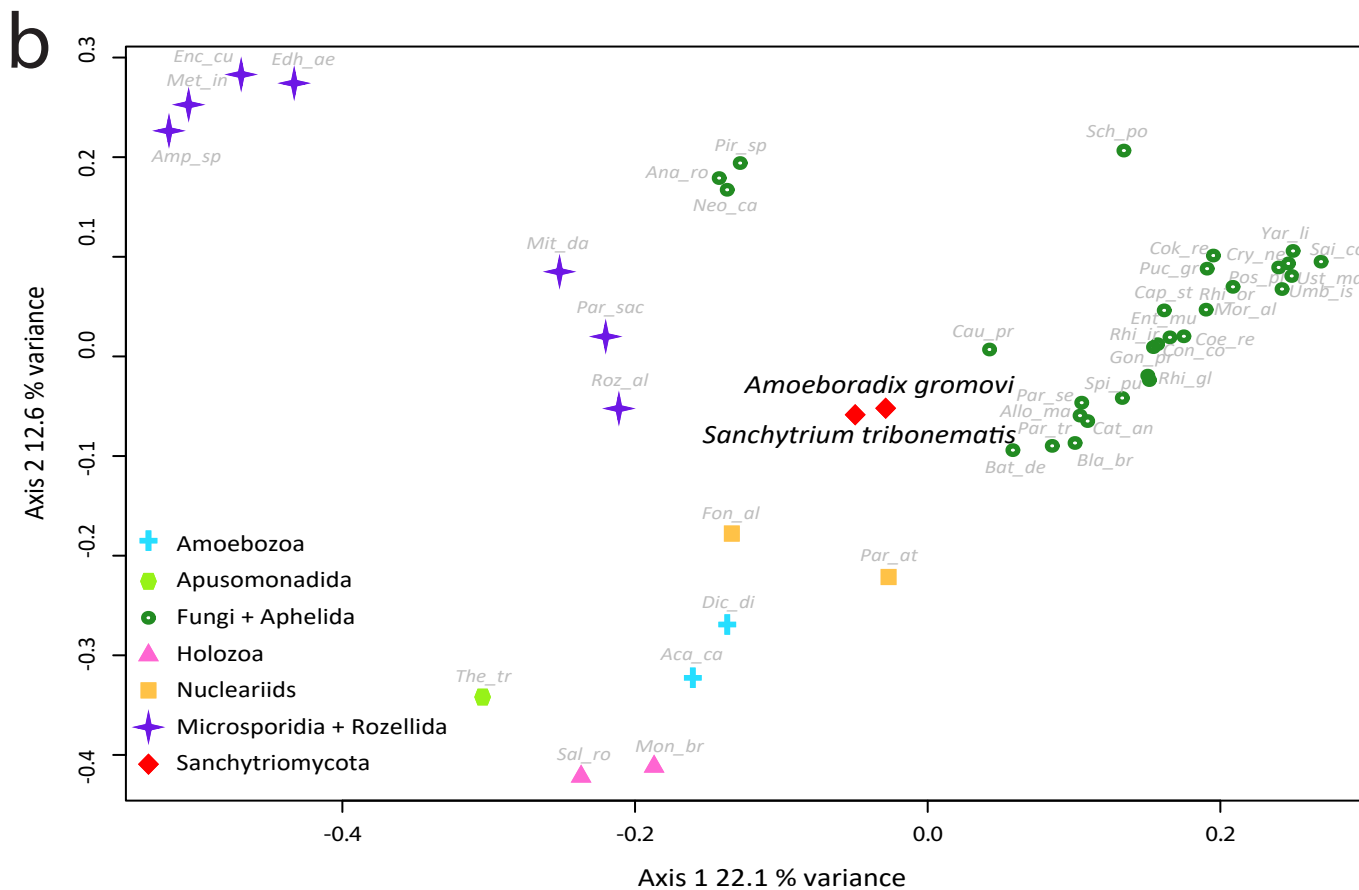

**a**

Dikarya  
Mucoromycota  
Zoopagomycota  
Olpidium  
Blastocladiomycota  
**Sanchytriomycota**  
Chytridiomycota  
Aphelida  
Microsporidia + Rozellida  
*R. allomycis*  
Nucleariids  
Choanoflagellata  
Apusomonadida  
Amoebozoa

*Yarrowia lipolytica*  
*Schizosaccharomyces pombe*  
*Saitoella complicata*  
*Puccinia graminis*  
*Ustilago maydis*  
*Postia placenta*  
*Cryptococcus neoformans*  
*Cokeromyces recurvatus*  
*Rhizopus oryzae*  
*Umbelopsis isabellina*  
*Mortierella verticillata*  
*Mortierella alpina*  
*Rhizophagus irregularis*  
*Capniomyces stellatus*  
*Coemansia reversa*  
*Conidiobolus coronatus*  
*Entomophthora muscae*  
*Basidiobolus heterosporus*  
*Olpidium bormovanus*  
*Coelomomyces latvittatus*  
*Catenaria anguillulae*  
*Blastocladiella britannica*  
*Allomyces macrognus*  
*Paraphysoderma sedebokerensis*  
***Sanchytrium tribonematis***  
***Anoeboradix gromovi***  
*Batrachomyces dendrobatidis*  
*Spizellomyces punctatus*  
*Rhizosomatium globosum*  
*Caulochytrium pratosteloides*  
*Neocallimastix californiae*  
*Piromyces* sp.  
*Anaeromyces robustus*  
*Gonapodya prolifera*  
*Hyalaraphidium curvatum*  
*Paraphelidium tribonemae*  
*Encephalitozoon cuniculi*  
*Metchnikovella incurvata*  
*Mitosporeidium daphniae*  
*Paramicrosporidium saccamoebae*  
*Rozella allomycis*  
*Parvularia atlantis*  
*Fonticula alba*  
*Salpingoeca rosetta*  
*Monosiga brevicollis*  
*Thecamonas trahens*  
*Dictyostelium discoideum*

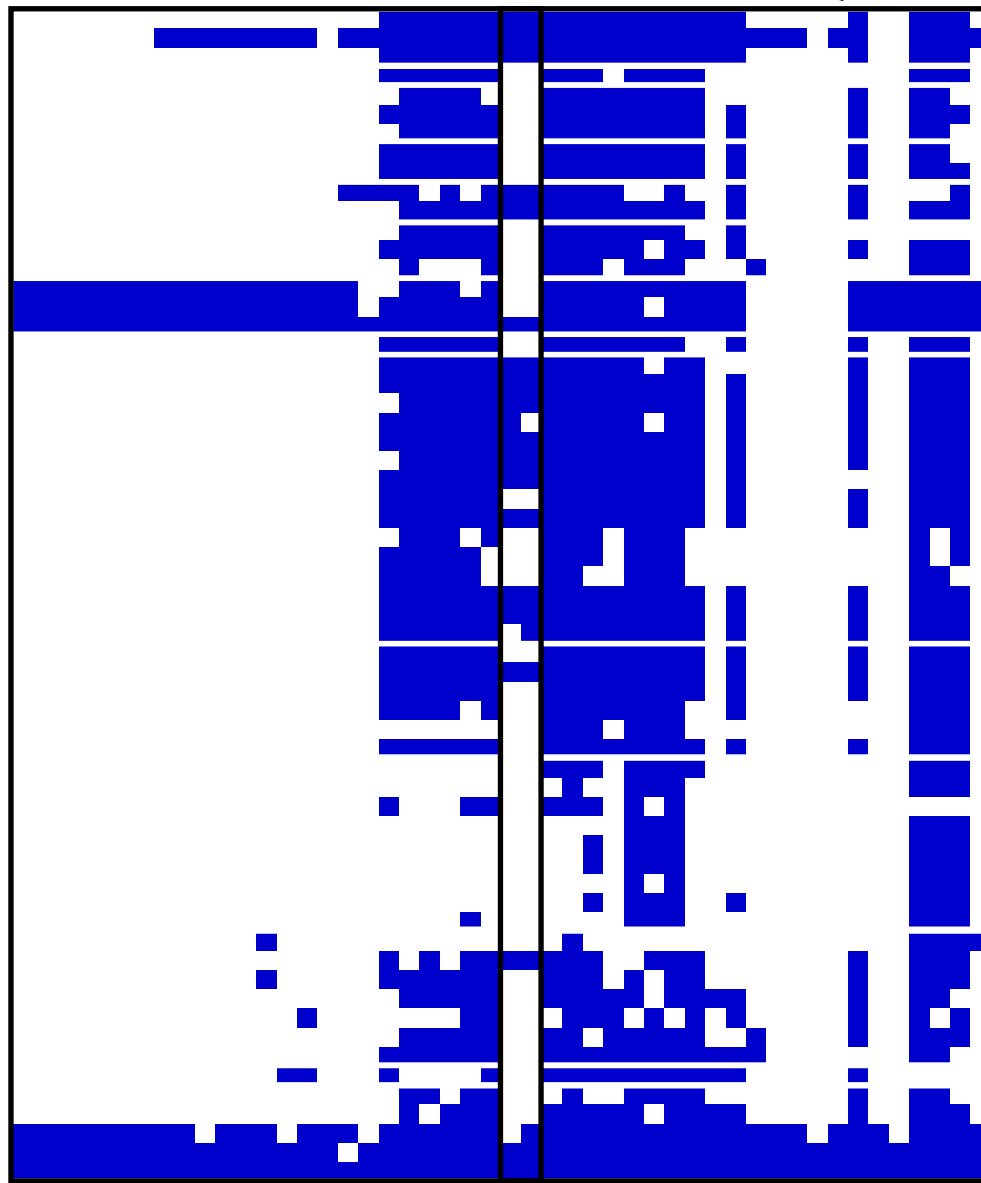

Kinesin 9  
Kinesin 13  
Kinesin II  
Heatr2  
IAD5  
IAD4\_DHY1  
IAD3\_DHY7  
IAD1\_beta  
IAD1\_alpha  
ODAbeta\_DYH9  
ODAalpha\_DYH5  
DLC\_axonemal  
DLC\_axonemal  
DYNC2H1  
DLC\_cytoplasmatic  
DLC\_cytoplasmatic  
DYNC1H1  
Hydin  
TTC26  
CLUAP1  
IFT81  
IFT72\_74  
IFT172  
IFT88  
IFT80  
IFT57  
IFT52  
IFT20  
IFT25  
IFT27  
IFT46  
IFT54\_TRAF3IP1  
IFT70  
IFT140  
WDR35\_IFT121  
IFT122  
IFT139\_TTC21B  
IFT43  
WDR19\_IFT144  
MKS1  
BBS7  
BBS3\_ARL6  
HsapBBS2  
BBS9\_PTHB1  
BBS8  
BBS5  
BBS4  
BBS1  
CEP192\_SPD2  
CEP164  
Centrin-2  
POC1  
CEP135\_BLD10  
SAS4\_CPAP  
SAS6  
PLK4\_PoloBox  
DeltaTubulin  
EpsilonTubulin  
GammaTubulin  
BetaTubulin  
AlphaTubulin

Kinesin Motors  
Singleheaded inner-arm dynein  
Doubleheaded inner-arm dynein  
Outer Dynein  
Axonemal Dyneins  
Cytoplasmic Dyneins  
Central mt pair in axonemes  
IFT-B (anterograde) with kinesin-2  
IFT-A (retrograde) with dynein  
BBSome and MKS  
Centriolar structure and Tubulins pericentriolar material  
Centriole biogenesis trigger, centriole replication, kinase  
Tubulins

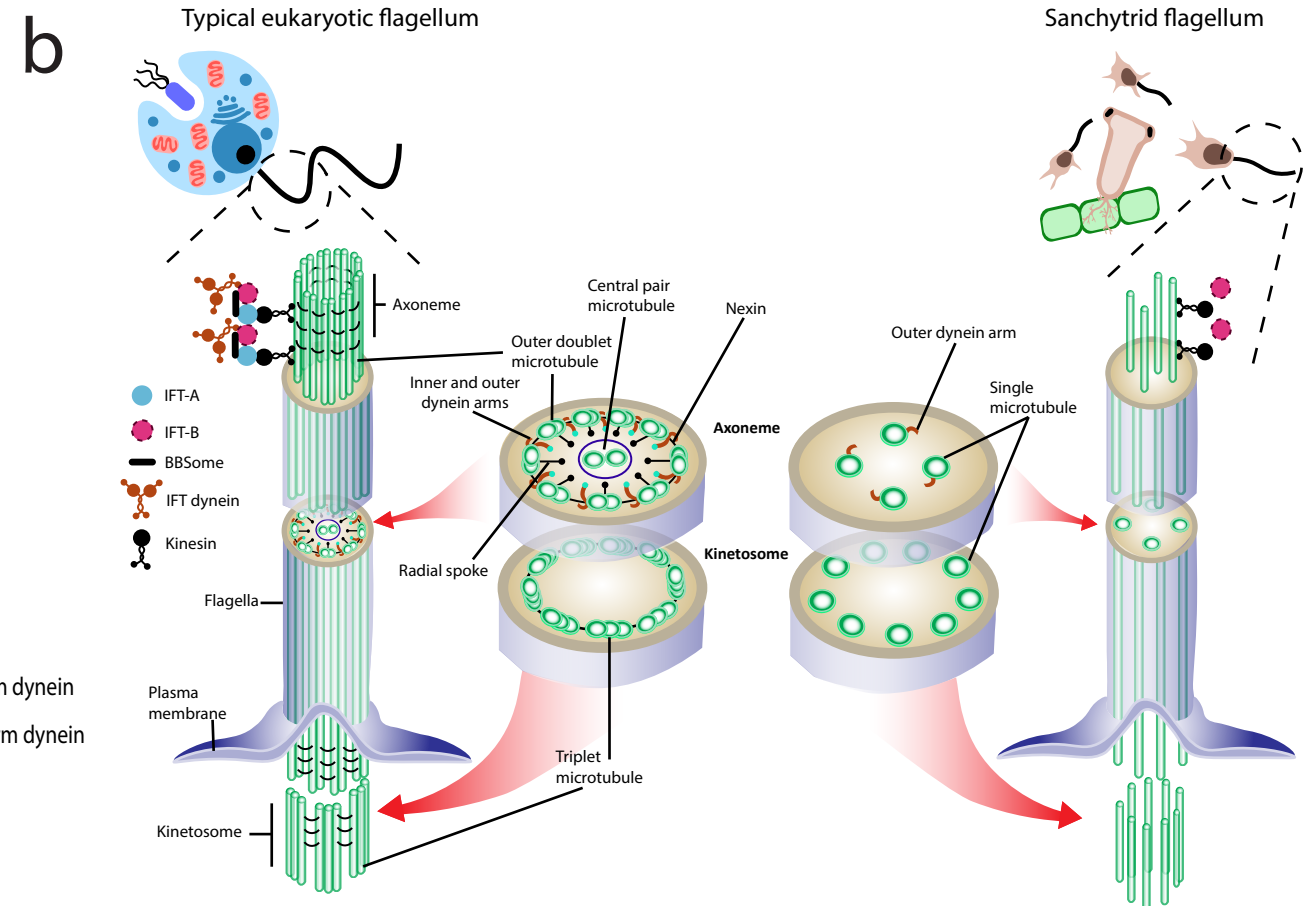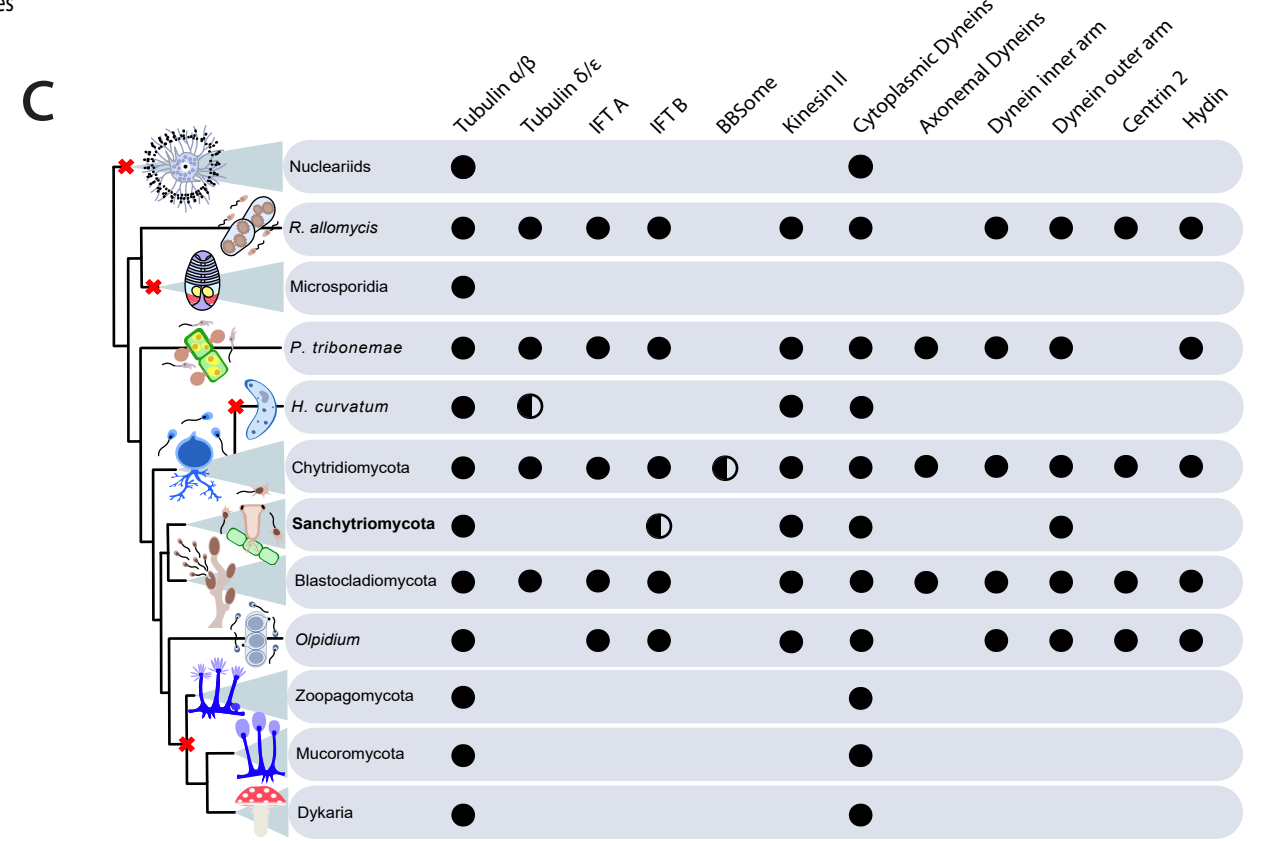

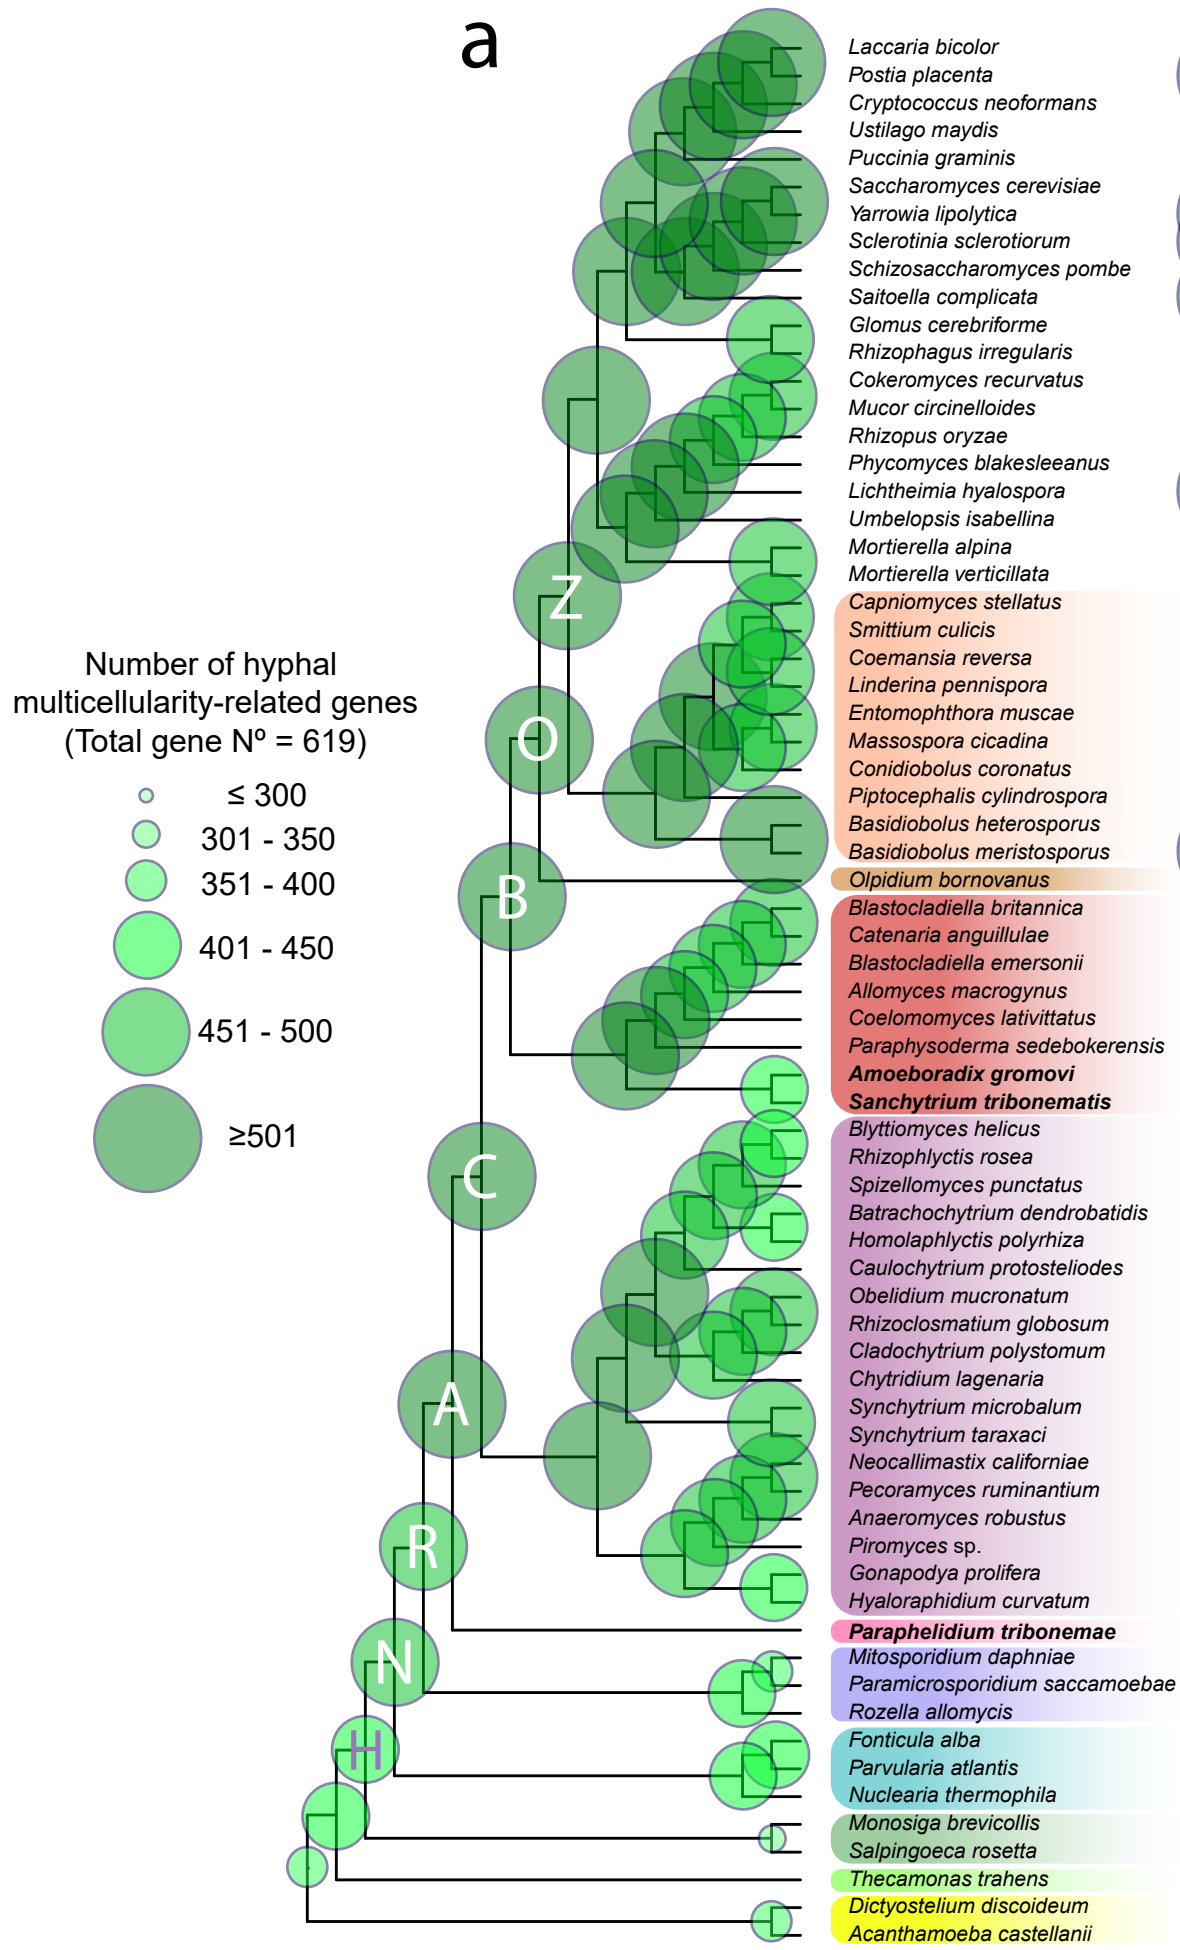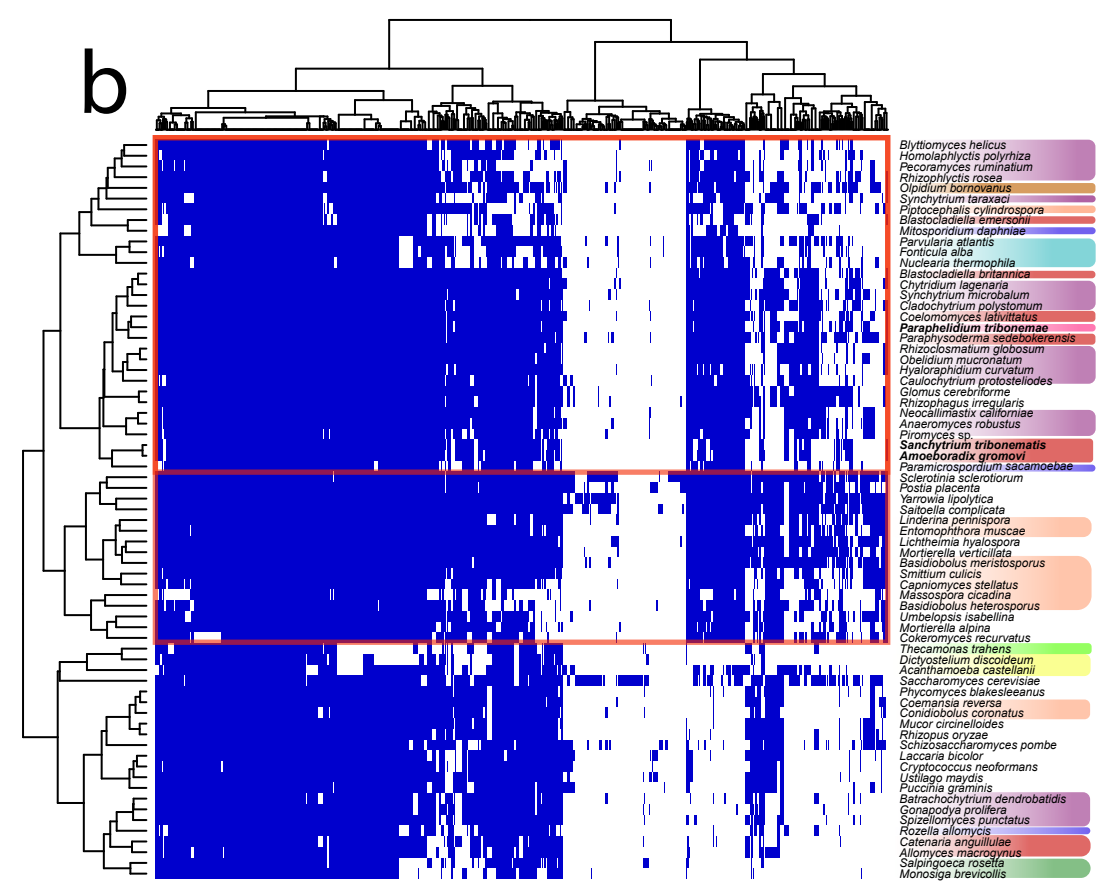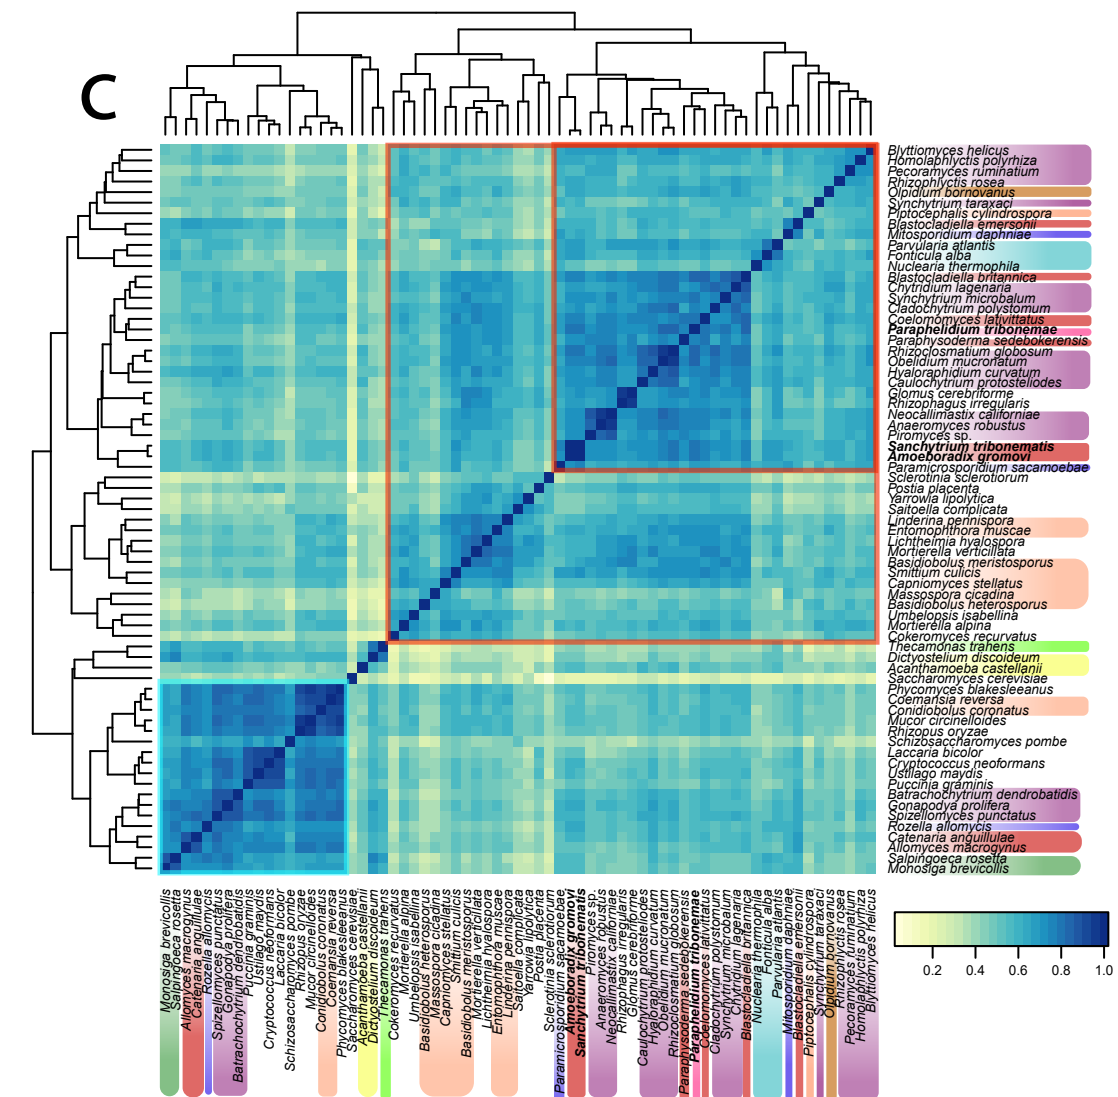

Source: https://biorxiv.org/content/10.1101/2020.11.19.389700v1.full.pdf
